# Supplementary material
Source: publisher figshare collection journal article supplement (https://gsapubs.figshare.com/ndownloader/files/34981735)
Supplement: Supplementary file 1 [file 34981735]

## Sheet: Sheet1
Table S3. Summary of geochronology results of intrusive rocks in the Beishan
Sample Number	Lithology	Location		Dating Method	Interpreted Age (Ma)	Data Source
		Latitude(°N)	Longitude(°E)
TW730a	granitic porphyry	Shibanjing		Zircon LA-MC-ICP-MS	211.8±1.6	M. Li et al., 2020c
HLS-1-1	granite	Xiaohulishan		Zircon LA-ICP-MS	216.8±0.02	Y. L. Zhang et al., 2012
HNS09823-2.2	granite porphyry	Huaniushan		Zircon LA-ICP-MS	217±1	S. Li et al., 2012
B80625-6	quartz syenite	Daquan		Zircon LA-ICP-MS	221±2	S. Li et al., 2012
B70822-4	syenogranite	Huaniushan		Zircon LA-ICP-MS	221±3	S. Li et al., 2012
B80628-3	syenogranite	Changliushui		Zircon LA-ICP-MS	223±2	S. Li et al., 2012
MSD09821-6.1	monzogranite	Baixianishan		Zircon LA-ICP-MS	224±1	S. Li et al., 2012
DQ09819-8	porphyritic quartz syenite	Daquan		Zircon LA-ICP-MS	225±1	S. Li et al., 2012
TW730b	granitic porphyry	Shibanjing		Zircon LA-MC-ICP-MS	227.5±1.6	M. Li et al., 2020c
08NC01A	felsic vein	Daquan		SHRIMP U-Pb	232.3±2.1	N. R. Cleven et al., 2018
D2028	biotite granite	41°47′27″	95°08′03″	Zircon LA-ICP-MS	236±4	Y. Wang et al., 2010
	granodiorite	Hongshishan		Zircon U-Pb	237.8±4.3	M. Q. Liu et al., 2006
B70817-2.1	quartz monzonite	Dahuoluo		Zircon LA-ICP-MS	238±1	S. Li et al., 2012
B70817-2.3	granodiorite	Dahuoluo		Zircon LA-ICP-MS	240±3	S. Li et al., 2012
17DJQ2-1	Granodiorite	Xiaoxigong		Zircon LA-ICP-MS	241.0±1.1	R. G. Zheng et al., 2021
XXG-36	quartz syenite porphyry	40°49′52.07″	96°49′40.08″	Zircon LA-ICP-MS	247.5±2.2	J. Zhu et al., 2015
MY32	plagiogranitic porphyry dike	Lucaogou		Zircon LA-ICP-MS	248.8±1.8	L. Guo et al., 2018
X10-115-1	granodiorite	40°47.6′	97°19.3′	Zircon LA-ICP-MS	257±3	Z. Y. He et al., 2015
16BS070-1	granodiorite	40°47′32″	97°19′15″	Zircon LA-ICP-MS	259±3	Y. Yuan et al., 2019
16BS092	granite	40°35′47″	96°37′34″	Zircon LA-ICP-MS	259±4	Y. Yuan et al., 2019
D4314	granodiorite	Dahuoluo		Zircon LA-ICP-MS	259.7±1.5	T. Bu et al., 2019
AB10-134	granodiorite	40°48′05″	97°20′04″	Zircon LA-ICP-MS	260±1	W. Zhang, 2013, W. Zhang et al., 2015
15BS07‑1	dioritic dyke	Chuanshanxun		Zircon LA-ICP-MS	260.5±2.3	R. G. Zhneg et al., 2017
02TW32	granodiorite	Hazhu		Zircon LA-MC-ICP-MS	262.2±1.1	M. Li et al., 2020b
BS07-35	granite	40°54'44"	96°38'43"	Zircon LA-ICP-MS	263±2	W. Zhang, 2013
02TW31	granodiorite	Hazhu		Zircon LA-MC-ICP-MS	263.6±1.2	M. Li et al., 2020b
BS07-35	monzogranite	Xijianquanzi		Zircon LA-ICP-MS	266.1±2.2	W. Zhang et al., 2010
	diorite	Hongliudaquan		Zircon LA-ICP-MS	267.2±3.7	Y. H. Jin et al., 2020
DJQ11-9	granite	Xiaoxigong pluton		Zircon LA-ICP-MS	267.3±1.3	R. G. Zheng et al., 2020
15BS09‑4	granitoid	Chuanshanxun		Zircon LA-ICP-MS	267.5±2.0	R. G. Zhneg et al., 2017
BS47-2	granite	Xiaoxigong pluton		Zircon LA-ICP-MS	268.3±2.6	R. G. Zheng et al., 2020
BS47-6	granite	Xiaoxigong pluton		Zircon LA-ICP-MS	269±2.3	R. G. Zheng et al., 2020
AB10-62	monzogranite	40°29′15″	99°33′04″	Zircon LA-ICP-MS	269±3	W. Zhang, 2013, W. Zhang et al., 2015
02TW19	monzogranite	Hazhu		Zircon LA-MC-ICP-MS	270.1±1.1	M. Li et al., 2020b
BS03-6	dioritic dike	Yinaoxia		Zircon LA-ICP-MS	270.2±1.9	R. G. Zheng et al., 2020
PY-4	granite	Poyi		Zircon LA-ICP-MS	271±2.2	S. C. Xue et al., 2018
BS07-177	granite	42°06'51"	97°06'47"	Zircon LA-ICP-MS	272±2	W. Zhang, 2013, W. Zhang et al., 2017
LY15-1	dioritic dike	41°0′21.5″	95°15′7.9″	SHRIMP U-Pb	272.7±4.4	Y. Y. Zhang et al., 2011
B80628-8.2	syenogranite	41°14′50″	95°53′55″	Zircon LA-ICP-MS	275±3	S. Li et al., 2013
BST-1	granitic porphyry	Baishantang		Zircon LA-ICP-MS	275±3	L. Shan et al., 2013
DDQ09824-3	gneissic monzogranite	41°12′07″	96°10′52″	Zircon LA-ICP-MS	277±2	S. Li et al., 2013
02TW24	monzogranite	Hazhu		Zircon LA-MC-ICP-MS	277.4±1.2	M. Li et al., 2020b
DDQ09824-2.1	mylonitic granodiorite	41°12′37″	96°09′35″	Zircon LA-ICP-MS	279±1	S. Li et al., 2013
DDQ09824-1.1	syenogranite	41°10′06″	96°05′46″	Zircon LA-ICP-MS	279±1	S. Li et al., 2013
TW6163	granodiorite	north Xiaohuangshan		Zircon LA-ICP-MS	279.5±1.6	Z. X. Zhao et al., 2016
HSS12	diorite	Hongshishan		Zircon LA-ICP-MS	279.7±4.8	B. X. Su et al., 2011,K. Z. Qin et al., 2011
19BS17-2	Biotite granite	Xiaoxigong		Zircon LA-ICP-MS	279.7±1.7	R. G. Zheng et al., 2021
YS03-11	syenogranite	40°37′50.5″	99°27′12.9″	SIMS zircon U-Pb	280.8±3	J. X. Ding et al., 2015
X10-46-1	quartz diorite	42°8.837′	97°5.279′	Zircon LA-ICP-MS	281±1	Y. Yuan et al., 2018
BS07-75	granite	Yinaoxia		Zircon LA-ICP-MS	281.7±2.9	W. Zhang et al., 2011
TW01	granodiorite	40°37′45″	98°35′30″	Zircon LA-ICP-MS	281.8±3.2	P. F. Yi et al., 2017
	monzogranite	Hongliudaquan		Zircon LA-ICP-MS	282.2±3.7	Y. H. Jin et al., 2020
B12-11	granodiorite	Shuangjingzi		Zircon LA-ICP-MS	284±9	R. G. Zheng et al., 2016b
LY1908-80	Granite	41°00′41.67″	95°04′25.75″	Zircon LA-ICP-MS	284.2±5.5	This study
BS07-329	granite	41°01'53"	99°25'47"	Zircon LA-ICP-MS	285±4	W. Zhang, 2013; W. Zhang et al., 2012b
AB10-65	granite	41°15′37″	96°56′05″	Zircon LA-ICP-MS	285.3±1.7	W. Zhang, 2013, W. Zhang et al., 2015
YS03-11	K-feldspar granite	40°37′50.5″	99°27′12.9″	SIMS zircon U-Pb	286.0±4.1	J. X. Ding et al., 2017
X10-47-1	quartz diorite	42°8.1′	97°6.1′	Zircon LA-ICP-MS	287±1	Y. Yuan et al., 2018
TW6241-1	syenogranitic porphyry dike	Liuyuan		Zircon LA-ICP-MS	288.5±1.4	H. R. Sun et al., 2020b
16BS036	granitic gneiss	40°51′48″	95°50′36″	Zircon LA-ICP-MS	289±3	Y. Yuan et al., 2019
BS07-75	granodiorite	41°03'39"	96°53'19"	Zircon LA-ICP-MS	290±3	W. Zhang, 2013
LY15-7	dioritic dike	41°0′52.1″	95°14′49.7″	SHRIMP U-Pb	291.4±4.9	Y. Y. Zhang et al., 2011
14SBD04	orthogneiss	Shibandun		Zircon LA-ICP-MS	294±2	D. F. Song et al., 2016
34TW1	granite	40°42′20″	92°57′30″	SHRIMP U-Pb	294±3.7	C. X. Qu et al., 2013
X10-37-2	felsic vein	40° 52.6'	95° 34.7'	Zircon LA-ICP-MS	295±2	H. Y. Jiang et al., 2013
48TW1	diorite	40°47′42″	93°11′21″	SHRIMP U-Pb	296±4.1	C. X. Qu et al., 2013
10HSS01	granitic gneiss	42º23´19.67´´	97º06´33.67´´	Zircon LA-ICP-MS	300±6.6	D. F. Song et al., 2013a
PM022031	quartz diorite	42°02′31″	99°34′21″	Zircon LA-ICP-MS	302.26±0.92	F. L. Yang et al., 2017
TW5026	granodiorite	42°22'40″	99°50'18″	Zircon LA-ICP-MS	303.4±2.1	Z. X. Zhao et al., 2018
PM022008	quartz diorite	42°00′27″	99°23′13″	Zircon LA-ICP-MS	303.43±0.91	F. L. Yang et al., 2017
BS07-17	granite	40°42′02″	96°41′07″	Zircon LA-ICP-MS	303.7±2.4	J. C. Feng et al., 2012
14SBD06	orthogneiss	Shibandun		Zircon LA-ICP-MS	304±2	D. F. Song et al., 2016
BS07-17	granite	40°42'02"	96°41'07"	Zircon LA-ICP-MS	304±2	W. Zhang, 2013
PM501Rz-6	trondhjemite	Hongshishan		Zircon LA-ICP-MS	305±1.9	W. B. Yang et al., 2020
16TW10	granodiorite			Zircon LA-MC-ICP-MS	306±1.2	M. Li et al., 2018
TW6145	quartz diorite	41°58′42″	99°20′12″	Zircon LA-ICP-MS	306.3±1.2	Z. X. Zhao et al., 2015
P13TW2	quartz diorite	42°24′31″	98°47′27″	Zircon LA-ICP-MS	308±3.1	X. M. Xu et al., 2018a
14TW20	monzogranite			Zircon LA-MC-ICP-MS	308.7±1.4	M. Li et al., 2018
06TW27	granodiorite			Zircon LA-MC-ICP-MS	310.3±1.4	M. Li et al., 2018
D0761-1	quartz diorite	42°03′28″	99°03′21″	Zircon LA-ICP-MS	310.59±0.88	F. L. Yang et al., 2017
02TW1	tonalite			Zircon LA-MC-ICP-MS	310.8±1.4	M. Li et al., 2018
PM203-53TW	Bt-monzogranite	42°11′	96°25′	SHRIMP U-Pb	311.7±4.1	J. R. Zhang et al., 2017
P2TW1	porphyritic granodiorite	42°24′15″	98°56′55″	Zircon LA-ICP-MS	312.1±3.2	H. F. Cheng et al., 2018
AB10-70	granite	41°18′10″	96°57′51″	Zircon LA-ICP-MS	313±2	W. Zhang, 2013
TW2	monzogranite	Yuanbaoshan		Zircon LA-ICP-MS	313.7±2.3	J. Li et al., 2019
D5180TW	tonalite	42°10′	97°07′	SHRIMP U-Pb	314.0±4.0	J. R. Zhang et al., 2017
D1203TW	monzogranite	42°17′	96°14′	SHRIMP U-Pb	314.4±4.7	J. R. Zhang et al., 2017
P2RZ2	trondhjemite	Yuanbaoshan		Zircon LA-ICP-MS	314.8±2.7	J. Li et al., 2019
PM03TW1	monzogranite	42°20′40″	98°56′00″	Zircon LA-ICP-MS	315.2±2.5	W. Zhu et al., 2019
D5300Rz-1	granodiorite	Hongshishan		Zircon LA-ICP-MS	315.6±1.6	W. B. Yang et al., 2020
1315HLX15	Granite	39°2.99'	95°25.63'	Zircon LA-ICP-MS	317±2	Y. Zhao et al., 2017
P2RZ1	granodiorite	Yuanbaoshan		Zircon LA-ICP-MS	317.1±3.1	J. Li et al., 2019
1325HLX25	Granite	39°43.38'	95°23.48'	Zircon LA-ICP-MS	320±2	Y. Zhao et al., 2017
TW6104	monzogranite	41°57′45″	99°05′59″	Zircon LA-ICP-MS	320±1	Z. Y. Hao et al., 2020
Hjbs01-37	monzogranite	42°11′44.5″	96°21′11.3″	SIMS zircon U-Pb	321.2±2.7	J. X. Ding et al., 2017
	granodiorite	Jiantanshan		Zircon LA-ICP-MS	323.6±3.2	Y. Tian et al., 2020
D3110TW	granodiorite	42°12′	96°33′	SHRIMP U-Pb	327.4±6.5	J. R. Zhang et al., 2017
B12-17	alkine-plagioclase granite	Shuangjingzi		Zircon LA-ICP-MS	327.6±1.6	R. G. Zheng et al., 2016b
AB09-115	granite	42°00'36"	96°20'47"	Zircon LA-ICP-MS	328±2	W. Zhang, 2013, W. Zhang et al., 2017
PM605-75TW	mylonitic granodiorite	42°12′	97°23′	SHRIMP U-Pb	328.8±4.8	J. R. Zhang et al., 2017
X10-44-1	granodiorite	42°11.471′	97°2.217′	Zircon LA-ICP-MS	330±2	Y. Yuan et al., 2018
D10020	granitic aplite	Shibanjing		Zircon LA-ICP-MS	332.1±6.8	Y. X. Wang et al., 2014
SF-TW	granodiorite	Shuangfengshan		Zircon LA-ICP-MS	334.8±2.1	X. C. Sun et al., 2021
	plagiogranite	41°44′37″	98°22′7″	Zircon LA-ICP-MS	338.2±1.1	Y. G. Fu et al., 2020
TW48	plagiogranite	42°25'15″	99°07'53″	Zircon LA-ICP-MS	342±4.7	Z. P. Zhang et al., 2020
11SBJ02	foliated granite	41°36′07.9″	98°25′42.9″	Zircon LA-ICP-MS	348.5±4.6	D. F. Song et al., 2013b
P16TW3	granodiorite	Baiyunshan		Zircon LA-ICP-MS	348.5±2	Z. N. Zhao et al., 2020
SJZH3-1	monzogranite	Suanjingzi		Zircon LA-ICP-MS	350±4.5	H. G. Zhao et al., 2019
SJZH2-2	granodiorite	Suanjingzi		Zircon LA-ICP-MS	350.7±5.3	H. G. Zhao et al., 2019
TW1024-1	quartz diorite	Baiheshan		Zircon LA-ICP-MS	350.8±1.5	L. F. Duan et al., 2020
SJZH1-1	granodiorite	Suanjingzi		Zircon LA-ICP-MS	351.7±5.2	H. G. Zhao et al., 2019
DQ1	two-mica granite			SHRIMP U-Pb	355±4	Y. Q. Yang et al., 2013
DQ4	monzogranite			SHRIMP U-Pb	355±5	Y. Q. Yang et al., 2013
W08-295	granite	41°28´19"	99°44´51"	Zircon LA-ICP-MS	356±3	W. Zhang, 2013; W. Zhang et al., 2012a
DQ2	monzogranite			SHRIMP U-Pb	359±4	Y. Q. Yang et al., 2013
132053	leucogranite vein	41.65301°	96.77003°	Zircon LA-ICP-MS	359±5	J. Y. Yu et al., 2016
1302YLH02	Granodiorite	40°09.20'	95°51.14'	Zircon LA-ICP-MS	360±3	Y. Zhao et al., 2017
141068	biotite tonalite	41.55468°	97.02339°	Zircon LA-ICP-MS	361±3	J. Y. Yu et al., 2016
1305YLH05	Granodiorite	40°08.93'	95°51.12'	Zircon LA-ICP-MS	361±4	Y. Zhao et al., 2017
D10018	plagiogranite	Shibanjing		Zircon LA-ICP-MS	361.7±6.8	Y. X. Wang et al., 2014
35SX	Diorite	40°06.62'	95°51.95'	Zircon LA-ICP-MS	362±2	Y. Zhao et al., 2017
08HX-2	Granite	40°11.68'	95°13.93'	Zircon LA-ICP-MS	362±2	Y. Zhao et al., 2017
1307HYS07	Granite	40°04.88'	94°56.31'	Zircon LA-ICP-MS	362±2	Y. Zhao et al., 2017
12SB07	Bt-granite	Shibanjing		Zircon LA-ICP-MS	362.6±3	X. Y. Wang et al., 2018b
33SX-2	Monzodiorite	40°06.47'	95°51.94'	Zircon LA-ICP-MS	363±3	Y. Zhao et al., 2017
12SB01	Bt-granodiorite	Jianshan		Zircon LA-ICP-MS	363.4±2.9	X. Y. Wang et al., 2018b
1132WG	quartz diorite	Mazongshan		Zircon LA-ICP-MS	363.7±3.7	X. F. Li, 2013
P16TW1	granodiorite	Baiyunshan		Zircon LA-ICP-MS	363.8±1.8	Z. N. Zhao et al., 2020
D5021Rz-1	quartz monzonite	Dahongshan		Zircon LA-ICP-MS	364.2±2.2	T. Yan et al., 2020
AB10-100	granite	41°33′12″	97°46′55″	Zircon LA-ICP-MS	365±2	W. Zhang, 2013, W. Zhang et al., 2018
1128MZ	granodiorite	Mazongshan		Zircon LA-ICP-MS	365.6±6.6	X. F. Li, 2013
141071	weakly porphyritic leucotonalite	41.55453°	97.02415°	Zircon LA-ICP-MS	370±3	J. Y. Yu et al., 2016
09DDS41-1	syenoporphyry	Dundunshan		Zircon LA-ICP-MS	370.9±1.3	Q. Q. Guo et al., 2014, 2017
08L05	granite	Liuyuan		SHRIMP U-Pb	373.7±2.7	Q. G. Mao et al., 2012a
10MZS04	biotite-plagioclase gneiss	41º29´06.8´´	96º30´57.01´´	Zircon LA-ICP-MS	374±3.4	D. F. Song et al., 2013a
	syenogranite	Baiyunshan		Zircon LA-ICP-MS	377.3±2.1	P. B. Zhao et al., 2017
P31WT2	monzogranite	Shibanjing		Zircon LA-ICP-MS	381.7±0.9	K. Q. Zhao et al., 2020
	plagiogranite	Shibanjing		Zircon LA-ICP-MS	384.3±2.3	Y. X. Wang et al., 2014
P32WT2	granodiorite	Shibanjing		Zircon LA-ICP-MS	385.5±1.1	K. Q. Zhao et al., 2020
P32WT1	pyroxene diorite	Shibanjing		Zircon LA-ICP-MS	385.6±1	K. Q. Zhao et al., 2020
12WT-2	gneissic granodiorite	Dashantou		SHRIMP U-Pb	386±6	L. Wang et al., 2017
P31WT3	granodiorite	Shibanjing		Zircon LA-ICP-MS	386.3±1	K. Q. Zhao et al., 2020
D6045Rz-1	tonalite	Dahongshan		Zircon LA-ICP-MS	387±2.2	T. Yan et al., 2020
	granite	41°38.95′	96°12.37′	Zircon LA-ICP-MS	387.6±8.2	L. S. Wang et al., 2009a
D0276RZ1	granodiorite	41°23'24″	95°31'54″	Zircon LA-ICP-MS	394±7	J. T. Wang et al., 2016
XIMZ141	granite	41°51′26″	96°47′55″	Zircon LA-ICP-MS	395±4.2	X. Y. Wang et al., 2018a
STW3	monzogranite	41°53 ′22 ″	98°22 ′39 ″	Zircon LA-ICP-MS	395.6±4.9	M. Li et al., 2020a
STW3	monzogranite	Shibanjing		Zircon LA-ICP-MS	395.6±4.9	C. Chen et al., 2020
	monzogranite	Liuyuan		SHRIMP U-Pb	396±15	Z. H. Zhao et al., 2007
B70823-8	K-feldspar granite	Huitongshan		Zircon LA-ICP-MS	397±3	S. Li et al., 2011
11SJZ16	gneiss	41°53′59″	96°21′07″	Zircon LA-ICP-MS	397±3	D. F. Song et al., 2015
D2733TW1	granodiorite	42°04 ′15 ″	98°47 ′27 ″	Zircon LA-ICP-MS	397.4±5.7	M. Li et al., 2020a
STW5	granodiorite	41°43 ′23 ″	98°23 ′21 ″	Zircon LA-ICP-MS	397.8±1.9	M. Li et al., 2020a
12LBQ07	mylonitic granite	41°48′28″	96°33′42″	Zircon LA-ICP-MS	398±3	D. F. Song et al., 2015
132039	K-feldspar-porphyritic granite	41.62976°	96.61023°	Zircon LA-ICP-MS	398±4	J. Y. Yu et al., 2016
PM01TW1	syenogranite	41°55 ′08 ″	97°57 ′37 ″	Zircon LA-ICP-MS	398.15±0.85	M. Li et al., 2020a, Z. L. Pan et al., 2017a
P13N8	syenogranite	41°29 ′18 ″	99°37 ′23 ″	Zircon LA-ICP-MS	399±3	M. Li et al., 2020a
D6021Rz-1	granodiorite	Dahongshan		Zircon LA-ICP-MS	399±3	T. Yan et al., 2020
11QJJ01	mylonite	41°25′25″	96°00′12″	Zircon LA-ICP-MS	399.8±10	Z. H. Tian et al., 2021
P13N31	monzogranite	41°30 ′34 ″	99°37 ′32 ″	Zircon LA-ICP-MS	400±1	M. Li et al., 2020a
	granodiorite	Fangshankou		Zircon LA-ICP-MS	400.1±2.3	S. Guan et al., 2019
11HYJ02	mylonite	41°44′34″	96°04′ 46″	Zircon LA-ICP-MS	400.3±9.8	Z. H. Tian et al., 2021
12LBQ16	mylonitic granite	41°48′18″	96°29′18″	Zircon LA-ICP-MS	401±4	D. F. Song et al., 2015
BA11-96	K-feldspar granite	Mazongshan		Zircon LA-ICP-MS	401.2±1.8	R. G. Zheng et al., 2018
PM017-2-1	monzogranite	41°53 ′17 ″	99°03 ′04 ″	Zircon LA-ICP-MS	401.6±5.3	M. Li et al., 2020a
BA11-130	leucogranite	Mazongshan		Zircon LA-ICP-MS	401.8±1.4	R. G. Zheng et al., 2018
PM019RZ1	diorite	41°25'47″	95°31' 41″	Zircon LA-ICP-MS	402±3	J. T. Wang et al., 2016
BS07-136	monzogranite	Mazongshan		Zircon LA-ICP-MS	402.2±3.0	R. G. Zheng et al., 2012
PM14-19	monzogranite	41°42′14″	96°03′28″	Zircon LA-ICP-MS	402.2±4.4	Liu & Zhu, 2018
LJ2020-23	Monzogranite	41°08′16.87″	95°01′56.45″	Zircon LA-ICP-MS	402.3±3.0	This study
TW6002	monzogranite	41°49 ′00 ″	99°05 ′28 ″	Zircon LA-ICP-MS	402.5±1.3	M. Li et al., 2020a
TW6030	monzogranite	41°48 ′57 ″	99°24 ′55 ″	Zircon LA-ICP-MS	402.7±1.6	M. Li et al., 2020a
12SBTG-H2	monzogranite	Yemajing		Zircon LA-ICP-MS	402.7±2.4	W. Xu et al., 2019b
BS07-136	monzogranite	41°46'13"	97°01'01"	Zircon LA-ICP-MS	403±3	W. Zhang, 2013
WXTW1	Bt-monzogranite	Wangxushan		Zircon LA-ICP-MS	403.2±2.7	W. C. Li et al., 2018
TW6037	monzogranite	41°48 ′40 ″	99°04 ′21 ″	Zircon LA-ICP-MS	403.5±1.4	M. Li et al., 2020a
SJP-3r	biotite monzogranite	Shijinpo		Zircon LA-ICP-MS	404.4±1.8	J. Zhu et al., 2016
H20-2	granite	Hongliuhe		SHRIMP U-Pb	404.8±5.2	Zhang & Guo, 2008
PM13TW3	quartz monzonite	41°52 ′04 ″	97°58 ′35 ″	Zircon LA-ICP-MS	405±3.4	M. Li et al., 2020a
PM13TW3	mylonitic quartz monzonite	Shibanjing		Zircon LA-ICP-MS	405.0±3.4	H. Zhang et al., 2021
LJ2020-47	Monzogranite	41°08′18.03″	95°02′02.29″	Zircon LA-ICP-MS	406.6±3.6	This study
WXTW2	Bt-monzogranite	Wangxushan		Zircon LA-ICP-MS	406.8±3.1	W. C. Li et al., 2018
	granodiorite	Heishantou		Zircon LA-ICP-MS	407.7±1.6	Z. X. Yang et al., 2021
AB10-80	granite	41°35′34″	96°58′24″	Zircon LA-ICP-MS	408±3	W. Zhang, 2013, W. Zhang et al., 2018
18TW46	granite	41°10′44.78″	93°48′50.32″	Zircon LA-ICP-MS	408.4±2.0	Q. L. Sun et al., 2020
XIMZ158	granite	41°38′05″	96°15′19″	Zircon LA-ICP-MS	408.5±3.1	X. Y. Wang et al., 2018a
XIMZ134	granite	41°51′26″	96°47′55″	Zircon LA-ICP-MS	409.4±2.7	X. Y. Wang et al., 2018a
11CH23	mylonitic granite	41°41.86′	96°24.761′	Zircon LA-ICP-MS	409.5±5.2	D. F. Song et al., 2013b
ZT001	Bt-granodiorite	41°50'26″	96°49'25″	Zircon LA-ICP-MS	410±2.8	R. L. Bai et al., 2020
TW31	monzogranite	41°13 ′15 ″	99°10 ′26 ″	Zircon LA-ICP-MS	410.9±2	M. Li et al., 2020a
TW6052	granitic mylonite	41°50′25″	99°24′09″	Zircon LA-ICP-MS	411±3	Y. Gao et al., 2016
	mylonitic quartz diorite	40°48′42.5″	96°45′30″	Zircon LA-ICP-MS	411.3±5.8	G. B. Liang et al., 2017
P12TW1	syenogranite	41°32 ′21 ″	99°12 ′39 ″	Zircon LA-ICP-MS	411.6±1	M. Li et al., 2020a
18TW6-30	granite	Qingbaishan		Zircon LA-ICP-MS	411.6±8.2	P. F. Fu et al., 2020
1304HX04	Granite	40° 11.25'	95°15.00'	Zircon LA-ICP-MS	412±3	Y. Zhao et al., 2017
TW5	monzogranite	41°47 ′00 ″	99°26 ′12 ″	Zircon LA-ICP-MS	413.5±1.4	M. Li et al., 2020a
HLH-094	tonalite	Hongliuhe		SHRIMP U-Pb	413.6±3.5	N. Cleven et al., 2015
TW6	monzogranite	41°42 ′18 ″	99°06 ′55 ″	Zircon LA-ICP-MS	415±1.1	M. Li et al., 2020a
SF07	granite	Shuangfengshan		Zircon LA-ICP-MS	415±3	S. Li et al., 2009
22DHSK	Granodiorite	39°55.73'	94° 19.28'	Zircon LA-ICP-MS	415±2	Y. Zhao et al., 2017
18BL-14	granite	41°50′25″	96°24′09″	Zircon LA-ICP-MS	415.8±0.79	Z. Li et al., 2019
GQ02-17	K-feldspar granite	41°07′57.10″	99°09′35.8″	SIMS zircon U-Pb	416.9±7.1	J. X. Ding et al., 2017
GQ02-17	K-feldspar granite	41°07′57.1″	99°09′35.8″	SIMS zircon U-Pb	417±1.7	J. X. Ding et al., 2015
PM5-8TW	syenogranite	Shenjing		Zircon LA-ICP-MS	417.8±6.6	F. Guo et al., 2020
10ASJ08	granitic gneiss			Zircon LA-ICP-MS	418±5	S. J. Ao et al., 2016
1301HX01	Granite	40°11.18'	95°15.12'	Zircon LA-ICP-MS	418±2	Y. Zhao et al., 2017
1304SWS04	Granite	40°02.17'	94°50.15'	Zircon LA-ICP-MS	418±3	Y. Zhao et al., 2017
HTS-1	syenogranite	Huitongshan		Zircon LA-ICP-MS	418.5±4.4	J. Zhu et al., 2016
P13N55	monzogranite	41°21 ′46 ″	99°22 ′13 ″	Zircon LA-ICP-MS	420±21	M. Li et al., 2020a
12CH17	gneissic monzo-diorite	41°40′49″	96°24′47″	Zircon LA-ICP-MS	420±3	D. F. Song et al., 2015
17DJQ10-1	Biotite granite	Xiaoxigong		Zircon LA-ICP-MS	420.1±1.6	R. G. Zheng et al., 2021
P3TW1	monzogranite	41°38 ′38 ″	99°34 ′10 ″	Zircon LA-ICP-MS	420.7±1.4	M. Li et al., 2020a
LJ2020-38	Granite	41°01′10.79″	95°02′02.11″	Zircon LA-ICP-MS	421.0±4.0	This study
BA11-91	quartz monzonite	Mazongshan		Zircon LA-ICP-MS	421.4±2	R. G. Zheng et al., 2018
GQ01-21	monzogranite	41°07′55.9″	99°09′35.4″	SIMS zircon U-Pb	422±1.5	J. X. Ding et al., 2015
D10021	granitic aplite	Shibanjing		Zircon LA-ICP-MS	422±47	Y. X. Wang et al., 2014
JWZ31-7	granodiorite	Jinwozi		Zircon LA-ICP-MS	422±5	L. D. Yu et al., 2020
LY-94	granite	41°06′52″	95°48′16″	Zircon LA-ICP-MS	422±5	Y. Wang et al., 2017
GQ01-21	K-feldspar granite	41°07′55.9″	99°09′35.4″	SIMS zircon U-Pb	422.4±4.8	J. X. Ding et al., 2017
	granodiorite	Huaniushan		SHRIMP U-Pb	423±8	Z. H. Zhao et al., 2007
11LBQ14	leucogranite dike	Lebaquan		Zircon LA-ICP-MS	423±15	D. F. Song et al., 2014
BS041	gneissic granite	41°56.980′	98°24.391′	SHRIMP U-Pb	423±4	X. M. Liu et al., 2010
LDTW1	Bt-monzogranite	Yingzuihongshan		Zircon LA-ICP-MS	423.1±1.5	P. B. Zhao et al., 2019
YZHS02-21	K-feldspar granite	41°05′13.4″	99°49′14.2″	SIMS zircon U-Pb	424±1.3	J. X. Ding et al., 2015
10ASJ10	granitic diorite			Zircon LA-ICP-MS	424±3	S. J. Ao et al., 2016
14GBQ2	leucogranite vein	Gubaoquan		Zircon LA-ICP-MS	424±8.6	W. M. Saktura et al., 2017
YZHS02-21	monzogranite	41°05′13.4″	99°49′14.2″	SIMS zircon U-Pb	424.0±3.2	J. X. Ding et al., 2017
LYB19	granite	Huitongshan		SHRIMP U-Pb	424.3±3.3	Q. G. Mao et al., 2010,2012a
38SX	Diorite	40°23.23'	95°48.68'	Zircon LA-ICP-MS	425±2	Y. Zhao et al., 2017
PM011-1-1	Hbl-monzogranite	41°57′25″	96°31′22″	Zircon LA-ICP-MS	425±2	B. T. Huang et al., 2021
XJ11-150	pyroxene diorite	Mingshujing		Zircon LA-ICP-MS	426±7	X. F. Li et al., 2015
BS07-111	granite	41°31'50"	96°59'16"	Zircon LA-ICP-MS	426±3	W. Zhang, 2013, W. Zhang et al., 2018
Z005	mylonitic monzogranite	42°06'22″	97°12'51″	Zircon LA-ICP-MS	427±2.5	R. L. Bai et al., 2020
JWZ20-4	granodiorite	Jinwozi		Zircon LA-ICP-MS	427±4	L. D. Yu et al., 2020
TW6015	granodiorite	41°54 ′22 ″	99°03 ′00 ″	Zircon LA-ICP-MS	428±2	M. Li et al., 2020a
X10-77-2	quartz monzonite	41°57.0′	98°24.4′	Zircon LA-ICP-MS	428±2	Y. Yuan et al., 2018
JWZ20-1	granodiorite	Jinwozi		Zircon LA-ICP-MS	428±5	L. D. Yu et al., 2020
14GZ01	Diorite	40°23.14'	95°48.99'	Zircon LA-ICP-MS	428±2	Y. Zhao et al., 2017
17DJQ8-10-1	Augen gneiss	Xiaoxigong		Zircon LA-ICP-MS	428.5±2.9	R. G. Zheng et al., 2021
NJ-1A	plagiogranite	Niujuanzi		Zircon LA-ICP-MS	429.8±2	S. D. Wang et al., 2018a
15BS51-1	Mylonitizcd diorite	Xiaoxigong		Zircon LA-ICP-MS	429.9±2.7	R. G. Zheng et al., 2021
X10-52-1	mylonitized granite	42°1.0′	97°4.7′	Zircon LA-ICP-MS	430±2	Y. Yuan et al., 2018
D10022	granitic mylonite	Shibanjing		Zircon LA-ICP-MS	430±2.5	Y. X. Wang et al., 2014
1131CG	granodiorite	Mazongshan		Zircon LA-ICP-MS	430.5±2.9	X. F. Li, 2013
PM10TW1	dioritic mylonite	41°33′26″	97°45′22″	Zircon LA-ICP-MS	430.9±4.7	H. Wang et al., 2021
17DJQ8-10-3	Augen gneiss	Xiaoxigong		Zircon LA-ICP-MS	431.1±2.0	R. G. Zheng et al., 2021
TW21	monzogranite	41°06 ′08 ″	99°11 ′10 ″	Zircon LA-ICP-MS	432.3±3.3	M. Li et al., 2020a
TL12TW1	gneissic monzogranite	41°53 ′02 ″	98°21 ′12 ″	Zircon LA-ICP-MS	433±2	M. Li et al., 2020a
X10-72-1	granite	41°53.2′	98°22.6′	Zircon LA-ICP-MS	433±2	Y. Yuan et al., 2018
131042	granite	41.63820°	96.77424°	Zircon LA-ICP-MS	433±3	J. Y. Yu et al., 2016
X10-98-2	mylonitic granite	40°35.1′	96°35.6′	Zircon LA-ICP-MS	433±4	Z. Y. He et al., 2014
PM006-27TW	gneissic granodiorite	Xiaertaole		Zircon LA-ICP-MS	433.1±9.2	H. J. Wang et al., 2020
17DJQ11-1	Mylonitizcd diorite	Xiaoxigong		Zircon LA-ICP-MS	433.5±1.6	R. G. Zheng et al., 2021
TW2	monzogranite	41°05 ′54 ″	99°13 ′33 ″	Zircon LA-ICP-MS	434.0±3.5	M. Li et al., 2020a
12LBQ64	porphyritic granite	Lebaquan		Zircon LA-ICP-MS	434±2	D. F. Song et al., 2015
X10-51-1	mylonitized granite	42°1.8′	97°5.0′	Zircon LA-ICP-MS	434±3	Y. Yuan et al., 2018
131043	granite	41.63577°	96.76914°	Zircon LA-ICP-MS	434±4	J. Y. Yu et al., 2016
	granodiorite	Hongliudaquan		Zircon LA-ICP-MS	434.1±1.7	Y. H. Jin et al., 2020
BA11-118	granodiorite	Mazongshan		Zircon LA-ICP-MS	434.4±6.1	R. G. Zheng et al., 2018
1130KZT	monzogranite	Mazongshan		Zircon LA-ICP-MS	435±2.8	X. F. Li, 2013
15BS47-1	Mylonitizcd diorite	Xiaoxigong		Zircon LA-ICP-MS	435.0±3.6	R. G. Zheng et al., 2021
PM13TW1	genissic granodiorite	41°54 ′45 ″	97°52 ′53 ″	Zircon LA-ICP-MS	435.3±2.6	M. Li et al., 2020a
BA11-87	quartz diorite	Mazongshan		Zircon LA-ICP-MS	435.4±2	R. G. Zheng et al., 2018
PM13TW4	genissic granodiorite	41°51 ′38 ″	97°58 ′21 ″	Zircon LA-ICP-MS	435.7±4.6	M. Li et al., 2020a
PM13TW4	mylonitic granodiorite	Shibanjing		Zircon LA-ICP-MS	435.7±4.6	H. Zhang et al., 2021
1122CL	quartz diorite	Mazongshan		Zircon LA-ICP-MS	435.8±5	X. F. Li, 2013
	K-feldspar granite	Huitongshan		SHRIMP U-Pb	436±9	Z. H. Zhao et al., 2007
XJ11-143	granite	Mingshujing		Zircon LA-ICP-MS	436±2	X. F. Li et al., 2015
TW6121	gneissic quartz diorite	41°51 ′12 ″	99°03 ′30 ″	Zircon LA-ICP-MS	436.1±1.5	M. Li et al., 2020a
LJ2020-46	Diorite	41°03′02.75″	95°14′34.58″	Zircon LA-ICP-MS	436.1±8.1	This study
TK15-12	gneissic monzogranite	41°39 ′41 ″	99°36 ′10 ″	Zircon LA-ICP-MS	436.2±2	M. Li et al., 2020a
PM02TW1	genissic granodiorite	41°57 ′30 ″	97°52 ′25 ″	Zircon LA-ICP-MS	436.65±0.94	M. Li et al., 2020a
XJ11-140	diorite	Mingshujing		Zircon LA-ICP-MS	437±2	X. F. Li et al., 2015
17DJQ14-1-2	Granodiorite gneiss	Xiaoxigong		Zircon LA-ICP-MS	437.2± 2.3	R. G. Zheng et al., 2021
PM006-50TW	gneissic monzogranite	Xiaertaole		Zircon LA-ICP-MS	437.3±9.8	H. J. Wang et al., 2021
PM06TW43-4	monzogranite	42°5'36″	98°30'35″	Zircon LA-MC-ICP-MS	437.7±2.3	W. C. Niu et al., 2019
B104-1	granodiorite	Gubaoquan		ID-TIMS zircon U-Pb	438±5	X. C. Liu et al., 2011
X10-54-1	mylonitized granite	42°0.1′	97°4.3′	Zircon LA-ICP-MS	438±4	Y. Yuan et al., 2018
17DJQ14-1-1	Granodiorite gneiss	Xiaoxigong		Zircon LA-ICP-MS	438.1±2.5	R. G. Zheng et al., 2021
X10-77-1	granite	41°57.0′	98°24.4′	Zircon LA-ICP-MS	439±17	Y. Yuan et al., 2018
17DJQ8-10-2	Augen gneiss	Xiaoxigong		Zircon LA-ICP-MS	439.0±3.0	R. G. Zheng et al., 2021
	granodioritic porphyry	Gongpoquan		Zircon LA-ICP-MS	439.6±7.1	C. L. Lv et al., 2021
15BS50-2	Mylonitizcd diorite	Xiaoxigong		Zircon LA-ICP-MS	440.2±2.8	R. G. Zheng et al., 2021
	granodiorite	Hongliudaquan		Zircon LA-ICP-MS	440.2±1.7	Y. H. Jin et al., 2020
D1007-1-1	Bt-monzogranite	41°50′42″	96°30′43″	Zircon LA-ICP-MS	441±4	B. T. Huang et al., 2021
D2710TW1	gneissic syenogranite	41°47 ′09 ″	98°56 ′41 ″	Zircon LA-ICP-MS	441.1±3.3	M. Li et al., 2020a, H. K. Dong et al., 2018
D2719TW1	gneissic monzogranite	41°49 ′57 ″	98°56 ′34 ″	Zircon LA-ICP-MS	441.2±1.8	M. Li et al., 2020a, H. K. Dong et al., 2018
11LBQ33	gabbroic-diorite	41°47′15″	96°26′39″	Zircon LA-ICP-MS	442±2	D. F. Song et al., 2015
P7TW2	granodiorite	Dongqiyishan		Zircon LA-ICP-MS	442.4±1.5	X. Z. Hu et al., 2015
D2654TW1	gneissic syenogranite	41°47 ′05 ″	98°40 ′46 ″	Zircon LA-ICP-MS	442.7±3.6	M. Li et al., 2020a
TW12	gneissic monzogranite	41°20 ′38 ″	99°25 ′02 ″	Zircon LA-ICP-MS	442.8±3.5	M. Li et al., 2020a
X10-50-1	mylonitized granite	42°2.1′	97°5.0′	Zircon LA-ICP-MS	443±2	Y. Yuan et al., 2018
D2621TW1	gneissic granodiorite	41°46 ′44 ″	98°49 ′48 ″	Zircon LA-ICP-MS	444±12	M. Li et al., 2020a, H. K. Dong et al., 2018
X10-49-1	mylonitized granite	42°2.3′	97°5.2′	Zircon LA-ICP-MS	444±3	Y. Yuan et al., 2018
10Tzh63	plagiogranite	Niujuanzi		Zircon LA-ICP-MS	444.3±1.9	Z. H. Tian et al., 2014
X10-69-1	granite	41°48.8′	98°22.1′	Zircon LA-ICP-MS	445±2	Y. Yuan et al., 2018
LY-101	granite	41°04′24″	95°16′15″	Zircon LA-ICP-MS	445±4	Y. Wang et al., 2017
X10-48-1	mylonitized granite	42°2.8′	97°5.7′	Zircon LA-ICP-MS	446±3	Y. Yuan et al., 2018
TL01TW3	gneissic monzogranite	41°58 ′16 ″	98°01 ′43 ″	Zircon LA-ICP-MS	446.4±3.8	M. Li et al., 2020a
10SYQ05	mylonitic granite	42º00´03.47´´	97º04´15.64´´	Zircon LA-ICP-MS	447.6±4.4	D. F. Song et al., 2013a
NJ-18A	plagiogranite	Niujuanzi		Zircon LA-ICP-MS	448.7±2	S. D. Wang et al., 2018a
XJ11-150	pyroxene diorite	Mingshujing		Zircon LA-ICP-MS	449±1	X. F. Li et al., 2015
X10-73-1	diorite	41°54.8′	98°23.2′	Zircon LA-ICP-MS	450±2	Y. Yuan et al., 2018
P20N37-2	gneissic syenogranite	41°40 ′30 ″	99°38 ′56 ″	Zircon LA-ICP-MS	450.3±2.2	M. Li et al., 2020a
11SBJ50	gneissic granite	41°49′31.4″	98°21′51.8″	Zircon LA-ICP-MS	450.4±3.5	D. F. Song et al., 2013b
P14N22-1	gneissic granodiorite	41°36 ′37 ″	99°35 ′41 ″	Zircon LA-ICP-MS	451±1	M. Li et al., 2020a
LY-69	granite	40°59′43″	95°08′54″	Zircon LA-ICP-MS	451±6	Y. Wang et al., 2017
LJ2020-25	Bt-monzogranite	41°07′00.85″	95°24′39.23″	Zircon LA-ICP-MS	451.4±2.4	This study
11SBJ66	migmatitic gneiss	41°44′56.2″	98°22′03.5″	Zircon LA-ICP-MS	452±11	D. F. Song et al., 2013b
JDTW12	gneissic tonalite	41°32 ′54 ″	97°47 ′31 ″	Zircon LA-ICP-MS	452.5±3.2	M. Li et al., 2020a,H. Wang et al., 2021
D2630TW1	gneissic tonalite	41°41 ′54 ″	98°43 ′20 ″	Zircon LA-ICP-MS	453±12	M. Li et al., 2020a
TK145	gneissic diorite	41°27 ′34 ″	99°36 ′52 ″	Zircon LA-ICP-MS	453.1 ±1.9	M. Li et al., 2020a
17DJQ14-1-3	Granodiorite gneiss	Xiaoxigong		Zircon LA-ICP-MS	454.9±1.9	R. G. Zheng et al., 2021
X10-71-1	diorite	41°51.3′	98°21.8′	Zircon LA-ICP-MS	455±2	Y. Yuan et al., 2018
TL01TW2	gneissic diorite	41°58 ′53 ″	98°01 ′43 ″	Zircon LA-ICP-MS	456±2	M. Li et al., 2020a
TW01	diorite	Shibanjing		Zircon LA-ICP-MS	456±2	S. P. Zhuan et al., 2018
TL01TW1	gneissic quartz diorite	41°43 ′26 ″	98°04 ′43 ″	Zircon LA-ICP-MS	456.2±2.1	M. Li et al., 2020a
PM02TW2	gneissic monzogranite	41°58 ′23 ″	97°52 ′23 ″	Zircon LA-ICP-MS	456.3±3.5	M. Li et al., 2020a
11SBJ55	mylonitic orthogneiss	41°48′24.8″	98°22′02.9″	Zircon LA-ICP-MS	456.8±5.3	D. F. Song et al., 2013b
TW6009	gneissic monzogranite	41°46 ′13 ″	99°01 ′53 ″	Zircon LA-ICP-MS	461.5±1.5	M. Li et al., 2020a
TW2571	gneissic quartz monzodiorite	41°44 ′00 ″	98°40 ′12 ″	Zircon LA-ICP-MS	463.7±4.9	M. Li et al., 2020a
12LBQ32	granitic gneiss	41°49′57″	96°34′31″	Zircon LA-ICP-MS	464±2	D. F. Song et al., 2015
X10-70-1	diorite	41°49.5′	98°21.9′	Zircon LA-ICP-MS	464±1	Y. Yuan et al., 2018
PM01TW1	quartz diorite	Shibanjing		Zircon LA-ICP-MS	464.4±2.1	D. Xiu et al., 2018
TW4	granodiorite	41°21 ′33 ″	99°21 ′09 ″	Zircon LA-ICP-MS	465.8±5.4	M. Li et al., 2020a
TW6130	gneissic monzogranite	41°52 ′27 ″	99°00 ′33 ″	Zircon LA-ICP-MS	465.8±2.5	M. Li et al., 2020a
LY-65	mylonitized diorite	41°05′42″	95°26′45″	Zircon LA-ICP-MS	466±7	Y. Wang et al., 2017
08NC05	Tonalite Gneiss	Baidunzi		Zircon LA-ICP-MS	467.9±4.0	N. R. Cleven et al., 2018
10SYQ03	granitic gneiss	42º02´16.16´´	97º05´27.01´´	Zircon LA-ICP-MS	471.1±7.7	D. F. Song et al., 2013a
PM04TW2	gneissic granodiorite	41°48 ′16 ″	98°25 ′29 ″	Zircon LA-ICP-MS	471.7±2.2	M. Li et al., 2020a
TW3891	diorite	41°30 ′20 ″	99°21 ′44 ″	Zircon LA-ICP-MS	472±1	M. Li et al., 2020a
10SYQ08	mylonitic granite	42º00´28.41´´	96º59´38.02´´	Zircon LA-ICP-MS	473.7±9.5	D. F. Song et al., 2013a
	monzogranite	Shibanjing		Zircon LA-ICP-MS	482.3±1.8	Y. X. Wang et al., 2014
D2022	quartz-feldspar mylonite	41°47′18″	95°07′53″	Zircon LA-ICP-MS	493.4±5.6	Y. Wang et al., 2010
10SYQ07	augen gneiss	42º02´26.68´´	96º56´02.71´´	Zircon LA-ICP-MS	499±6.6	D. F. Song et al., 2013a
Tw4027-3	plagiogranite	Baiyunshan		Zircon LA-ICP-MS	519.8±2.1	J. Tian et al., 2020a
11CH05	granitic gneiss	41°41.86′	96°24.761′	Zircon LA-ICP-MS	525.7±6.1	D. F. Song et al., 2013b
P1TW2	plagioclase granite	Yueyashan		Zircon LA-ICP-MS	530.2±1.2	X. Z. Hu et al., 2015
TW37	gabbroic diorite	Yueyashan		Zircon LA-ICP-MS	530.2±4.8	X. Z. Hu et al., 2015
08YYS	plagiogranite			SIMS zircon U-Pb	533±1.7	S. J. Ao et al., 2012
HBS5309	plagioclase granite	Yueyashan		SHRIMP U-Pb	536±7	Q. Y. Hou et al., 2012
09AB11	granitic gneiss			Zircon LA-ICP-MS	713±6	S. J. Ao et al., 2016
16JS78	orthogneiss	40°59'24.2″	95°02'35.6″	Zircon LA-ICP-MS	867.5±1.9	J. Soldner et al., 2020a
13LY04G	orthogneiss	40°59′26.3″	95°02′24.8″	Zircon LA-ICP-MS	871±5	Q. Liu et al., 2015
X10-37-1	gneiss	40° 52.6'	95° 34.7'	Zircon LA-ICP-MS	881±9	H. Y. Jiang et al., 2013
Tw8823	mylonitized monzonite	40◦44′ 12′′	99◦ 31′ 08′′	Zircon LA-ICP-MS	884±8	B. R. Wang et al., 2021
PM06TW43-1	gneissic granite	42°5'36″	98°30'35″	Zircon LA-MC-ICP-MS	885±4	W. C. Niu et al., 2019
X11-101-1	gneissic granitoid	40°59'24″	94°55'51″	Zircon LA-ICP-MS	891±4	Y. Yuan et al., 2015
X11-100-1	gneissic granitoid	40°59'20″	94°55'53″	Zircon LA-ICP-MS	892±4	Y. Yuan et al., 2015
Tw25	mylonitized granite	40◦44′ 41′′	99◦ 32′ 16′′	Zircon LA-ICP-MS	894±3	B. R. Wang et al., 2021
Tw26	granitic gneiss	40◦44′ 06′′	99◦ 30′ 10′′	Zircon LA-ICP-MS	895±4	B. R. Wang et al., 2021
LY-75	granitic lens	40°58′55″	95°07′20″	Zircon LA-ICP-MS	895±15	Y. Wang et al., 2017
X11-97-2	gneissic granitoid	40°58'24″	94°55'21″	Zircon LA-ICP-MS	897±5	Y. Yuan et al., 2015
X11-99-1	gneissic granitoid	40°58'46″	94°55'44″	Zircon LA-ICP-MS	897±2	Y. Yuan et al., 2015
X11-99-2	gneissic granitoid	40°58'46″	94°55'43″	Zircon LA-ICP-MS	898±4	Y. Yuan et al., 2015
X10-27-2	gneissic granitoid	40°59'18″	95°02'24″	Zircon LA-ICP-MS	899±3	Y. Yuan et al., 2015
X10-24-4	granitic gneiss	40°58.1′	95°2.4′	Zircon LA-ICP-MS	902±5	X. F. Ye et al., 2013
13LY03E	orthogneiss	40°59′24.1″	95°02′23.4″	Zircon LA-ICP-MS	905±6	Q. Liu et al., 2015
14GBQ10	orthogneiss	Gubaoquan		Zircon LA-ICP-MS	920±14	W. M. Saktura et al., 2017
LY-45	mylonite	41°01′17″	95°09′00″	Zircon LA-ICP-MS	926±15	Y. Wang et al., 2017
X10-7-4	gneissic granitoid	40°30'19″	93°32'04″	Zircon LA-ICP-MS	933±2	Y. Yuan et al., 2015
13LY20C	granitic gneiss	41°46′57.0″	95°08′02.4″	Zircon LA-ICP-MS	1014±15	Q. Liu et al., 2015
X10-7-4	gneissic granitoid	40°30'19″	93°32'04″	Zircon LA-ICP-MS	1024±32	Y. Yuan et al., 2015
16BS036	granitic gneiss	40°51′48″	95°50′36″	Zircon LA-ICP-MS	1395±4	Y. Yuan et al., 2019
16BS077	granitic gneiss	40°47′31″	97°19′20″	Zircon LA-ICP-MS	1401±5	Y. Yuan et al., 2019
16BS072	granodiorite	40°47′15″	97°19′19″	Zircon LA-ICP-MS	1403±22	Y. Yuan et al., 2019
16BS069	granodiorite	40°47′33″	97°19′17″	Zircon LA-ICP-MS	1404±4	Y. Yuan et al., 2019
16BS070-1	granodiorite	40°47′32″	97°19′15″	Zircon LA-ICP-MS	1407±5	Y. Yuan et al., 2019
X12-22-1	biotite plagioclase gneiss	40°47.6′	97°19.3′	Zircon LA-ICP-MS	1408±4	Z. Y. He et al., 2015
16BS070-2	gneiss	40°47′32″	97°19′15″	Zircon LA-ICP-MS	1418±10	Y. Yuan et al., 2019
16BS092	granite	40°35′47″	96°37′34″	Zircon LA-ICP-MS	1419±19	Y. Yuan et al., 2019
X11-97-2	gneissic granitoid	40°58'24″	94°55'21″	Zircon LA-ICP-MS	1434±28	Y. Yuan et al., 2015
X11-101-1	gneissic granitoid	40°59'24″	94°55'51″	Zircon LA-ICP-MS	1438±48	Y. Yuan et al., 2015
16BS075	gar-bearing granite	40°47′05″	97°19′29″	Zircon LA-ICP-MS	1450±22	Y. Yuan et al., 2019
P6TW1	plagioclase amphibolite	41°57'34″	98°32'54″	Zircon LA-ICP-MS	1623±21	Z. P. Zhang et al., 2017
X10-5-2	augen gneiss	40°2.0′	94°50.2′	Zircon LA-ICP-MS	1733±25	Z. Y. He et al., 2013
X10-1-8	augen gneiss	40°2.3′	94°49.6′	Zircon LA-ICP-MS	1767±38	Z. Y. He et al., 2013
X10-9-1	augen gneiss	39°57.1′	94°19.6′	Zircon LA-ICP-MS	1852±34	Z. Y. He et al., 2013
X11-114-1	TTG gneiss	40° 07.058'	95° 43.412'	Zircon LA-ICP-MS	2642±63	K. Q. Zong et al., 2013
X11-122-1	TTG gneiss	40° 06.789'	95° 43.369'	Zircon LA-ICP-MS	2708±54	K. Q. Zong et al., 2013
X11-113-2	TTG gneiss	40° 07.027'	95° 43.413'	Zircon LA-ICP-MS	2717±31	K. Q. Zong et al., 2013
D10019	quartz plagioclase gneiss	Shibanjing		Zircon LA-ICP-MS	2757±790	Y. X. Wang et al., 2014
09HSS3	dacite	Hongshishan		Zircon LA-ICP-MS	ca. 265.1	B. X. Su et al., 2011
13WTG-Tw1	andesite	40.69°	98.61°	Zircon LA-ICP-MS	267.8±3.1	W. Xu et al., 2019a
LY-20	volcanic clastic	41°01′17″	95°28′12″	Zircon LA-ICP-MS	268±9	Y. Wang et al., 2017
GQ-LW	rhyolite, Ganquan Fm.	Baishantang		Zircon LA-ICP-MS	272.4±1.2	Y. An, 2018
14YJZ-TW2	dacite	40° 32'19″	98°38'56″	Zircon LA-ICP-MS	272.7±2.6	Y. Z. Niu et al., 2018b
FS-7	rhyolite	Yinaoxia		Zircon LA-ICP-MS	273±1	R. G. Zheng et al., 2016a
LY-95	rhyolite	41°05′54″	95°48′19″	Zircon LA-ICP-MS	277±4	Y. Wang et al., 2017
LY-89	dacite	41°06′21″	95°56′48″	Zircon LA-ICP-MS	279±3	Y. Wang et al., 2017
HSS6	rhyolite	Hongshishan		Zircon LA-ICP-MS	279.1±2.9	B. X. Su et al., 2011,K. Z. Qin et al., 2011
14SHJ-TW1	rhyolitic tuff	41°02'42″	97°24'08″	Zircon LA-ICP-MS	279.2±4.8	Y. Z. Niu et al., 2018b
LY-88	dacite	41°06′21″	95°56′48″	Zircon LA-ICP-MS	280±4	Y. Wang et al., 2017
14JQZ-TW2	andesite	40° 46'23″	99°40'34″	Zircon LA-ICP-MS	280.9±2.8	Y. Z. Niu et al., 2018b
	rhyolite	Erdaoquan		Zircon LA-ICP-MS	282.5±1.7	Q. P. Yang et al., 2019
XD1	mylonitic dacite	41°01′31.7″	96°49′57.8″	Zircon LA-ICP-MS	285±4	P. X. Xiao et al., 2010
16HLG-TW4	dacite	40° 56'43″	94°47'19″	Zircon LA-ICP-MS	285.7±2.9	Y. Z. Niu et al., 2018b
16HHQ-Tw1	dacite	41. 04°	97. 56°	Zircon LA-ICP-MS	289.5±2.3	W. Xu et al., 2019a
14SHJ-Tw2	rhyolite	41. 04°	97. 40°	Zircon LA-ICP-MS	291.1±2.6	W. Xu et al., 2018
13YJZ-TW1	dacite	40° 37'20″	98°34'39″	Zircon LA-ICP-MS	291.7±2.3	Y. Z. Niu et al., 2018a
16DSS-TW6	dacite	40° 33'39″	94°04'49″	Zircon LA-ICP-MS	293.4±2	Y. Z. Niu et al., 2018a
13GQ-TW1	rhyolite	40°44'53″	94° 21'38″	Zircon LA-ICP-MS	293.8±4.8	Y. Z. Niu et al., 2018a
16HTS-TW2	perlite	41° 05'02″	95° 16'35″	Zircon LA-ICP-MS	293.9±2.7	Y. Z. Niu et al., 2018a
16HLE-TW2	rhyolitic tuff	41° 03'43″	95°20'42″	Zircon LA-ICP-MS	294.4±2.8	Y. Z. Niu et al., 2018a
14SHSS-Tw1	rhyolite	40. 81°	99. 74°	Zircon LA-ICP-MS	294.7±2.1	W. Xu et al., 2018
12D251-TW1	tuff	Hongshishan		Zircon LA-ICP-MS	296.8±3.5	J. C. Lu et al., 2013
12D251-TW1	tuff	Tianshuijing		Zircon LA-ICP-MS	296.8±3.5	Y. Z. Niu et al., 2014
16-9YQ	andesite	40°48′37″	93°00′53″	SHRIMP U-Pb	298±5	Y. H. Li et al., 2012
12D252-TW1	tuff, Baishan Fm.	Hazhu		Zircon LA-ICP-MS	299.1±2.4	Y. Z. Niu et al., 2013
12BYQ-TW3	tuff	Hongshishan		Zircon LA-ICP-MS	299.4±5.9	J. C. Lu et al., 2013
12HYS-TW1	dacitic porphyry, Baishan Fm.	Heiyingshan		Zircon LA-ICP-MS	308.6±1	Y. Z. Niu et al., 2013
12D107-TW1	andesite	Suishishan		Zircon LA-ICP-MS	311.1±3.2	Y. Z. Niu et al., 2014
TW2506-1	dacite; Baishan Fm.	Hazhu		Zircon LA-MC-ICP-MS	313.5±3.4	Y. W. Ren et al., 2019
TW7756-1	rhyollite; Baishan Fm.	Hazhu		Zircon LA-MC-ICP-MS	314.7±1.7	Y. W. Ren et al., 2019
12BYQ-TW1	tuff	Hongshishan		Zircon LA-ICP-MS	314.9±3.3	J. C. Lu et al., 2013
P4RZ1	dacitic tuff	Yuanbaoshan		Zircon LA-ICP-MS	315.9±3.4	Y. Y. Chen et al., 2019
TW6151	rhyolite	41°57′23″	99°15′24″	Zircon LA-ICP-MS	318.5±1.2	Y. Q. Jia et al., 2016
D6151	rhyolite	41°57′25″	99°15′24″	Zircon LA-ICP-MS	318.5±1.2	H. D. Chen et al., 2017
X10-45-1	dacite	42°10.5′	97°2.4′	Zircon LA-ICP-MS	325±1	Y. Yuan et al., 2018
TW9015-2	andesite; Baishan Fm.	Hazhu		Zircon LA-MC-ICP-MS	325.6±1.4	Y. W. Ren et al., 2019
Tw4013.1	dacitic tuff	Baiyunshan		Zircon LA-ICP-MS	363.5±2.5	J. Tian et al., 2020b
BS074	andesite, Dundunshan Group	41°17′24″	96°21′23″	Zircon LA-ICP-MS	367±10	X. M. Li et al., 2011
BS074	dacite	Dundunshan		Zircon LA-ICP-MS	367±10	G. Q. Wang, 2015
Tw4001.1	dacite lava	Baiyunshan		Zircon LA-ICP-MS	368.1±1.8	J. Tian et al., 2020b
09DDS45-1	rhyolite	Dundunshan		Zircon LA-ICP-MS	368.8±3.1	Q. Q. Guo et al., 2014, 2017
BST-11	rhyolitic porphyry	Baishantang		Zircon LA-ICP-MS	371.1±2.8	L. Shan et al., 2013
BST-1	rhyolitic porphyry	Baishantang		Zircon LA-ICP-MS	374.9±2.3	W. D. Hui et al., 2013
TW2904-1	rhyollite; Queershan Group	42°11'42″	98°57'19″	Zircon LA-ICP-MS	386.9±1.7	B. F. Ren et al., 2019
132104	schistose dacite	41.68643°	96.50790°	Zircon LA-ICP-MS	391±3	J. Y. Yu et al., 2016
18SBQ-H1	rhyolitic porphyry	Yemajing		Zircon LA-ICP-MS	392.9±2.5	W. Xu et al., 2019b
YMQ-TW2	rhyolite,Sangejing Fm.	Yemaquan		Zircon LA-ICP-MS	404.8±3.9	G. H. Tao et al., 2020
11NC57I	tuff	Hongliuhe		Zircon LA-ICP-MS	409.0±2.9	N. R. Cleven et al., 2018
BA11-62	andesite	41º23´34.4´´	99º22´52.3´´	Zircon LA-ICP-MS	415.3±2.7	R. G. Zheng et al., 2019
18LQJ-TW1	rhyolite	41°18′28″	96°08′44″	Zircon LA-ICP-MS	417.5±1.4	Y. Z. Niu et al., 2020
18HUI-TW2	rhyolite	41°05′12″	95°15′23″	Zircon LA-ICP-MS	417.8±1.2	Y. Z. Niu et al., 2020
18YSS-TW5	rhyolitic lava	41°06′35″	95°0′34″	Zircon LA-ICP-MS	418.9±1.2	Y. Z. Niu et al., 2020
XHLS-01	andesitic porphyry	Xiaohulishan		Zircon LA-ICP-MS	419±5	D. Y. Zhang et al., 2020
BA11-60	andesite	41º23´34.4´´	99º22´52.3´´	Zircon LA-ICP-MS	420.5±4.2	R. G. Zheng et al., 2019
TW7	andesite	Dongqiyishan		Zircon LA-ICP-MS	421±15	X. Z. Hu et al., 2015
BS19-1	andesite	41º23´48.4´´	99º20´30.6´´	Zircon LA-ICP-MS	427.6±3.6	R. G. Zheng et al., 2019
	dacitic porphyry	Gongpoquan		Zircon LA-ICP-MS	431±8.8	C. L. Lv et al., 2021
BS44-1	andesite	41º23´22.4´´	99º23´43.6´´	Zircon LA-ICP-MS	431.2±4.4	R. G. Zheng et al., 2019
12LBQ29	volcaniclastic rock	41°47′41″	96°30′24″	Zircon LA-ICP-MS	ca. 441	D. F. Song et al., 2015
08LY01	dacite	Liuyuan		SHRIMP U-Pb	442.2±3.1	Q. G. Mao et al., 2012a
12YDZ11	volcaniclastic rock	Lebaquan		Zircon LA-ICP-MS	ca. 446	D. F. Song et al., 2015
08NC03C	tuff	Liuyuan		SHRIMP U-Pb	449.9±2.9	N. R. Cleven et al., 2018
P3-117	metabasaltic andesite	Mazongshan		Zircon LA-ICP-MS	451.3±3.5	J. X. Wang et al., 2020
HN	meta-dacite	Huaniushan		Zircon LA-ICP-MS	454.7±0.87	J. Q. Xie et al., 2018
XHLS-02	andesite	Xiaohulishan		Zircon LA-ICP-MS	489±11	D. Y. Zhang et al., 2020
08NC04A	metamorphosed ash layer	Daquan		SHRIMP U-Pb	673.2±5.6	N. R. Cleven et al., 2018
BS029	metadiabase	41°50.254′	99°24.091′	SHRIMP U-Pb	114.8±3.3	X. M. Liu et al., 2010
CH2	diabase	Cihai		Zircon LA-ICP-MS	128.5±0.3	T. Hou et al., 2013
	diabase dike	Hongyanjing		Zircon LA-ICP-MS	219±1.2	Z. H. Tian et al., 2013
LY-77	lam dike	41°01′35″	95°41′53″	Zircon LA-ICP-MS	227±7	Y. Wang et al., 2017
TW6241-2	diabase dike	Liuyuan		Zircon LA-ICP-MS	227.5±1.4	H. R. Sun et al., 2020a
LY20-8	ultramafic	41°9′	95°37′33″	SHRIMP U-Pb	250.4±9	Y. Y. Zhang et al., 2011
LB1	alkaline dike (mafic?)	Poyi		SHRIMP U-Pb	252±9	J. W. Mao et al., 2012
XWL-V	gabbro	Xuanwoling		SIMS zircon U-Pb	260.7±2	B. X. Su et al., 2010
16BS095	dolerite dyke	40°38′24″	96°42′48″	Zircon LA-ICP-MS	262±5	Y. Yuan et al., 2019
	mafic dike	Luodong		SIMS zircon U-Pb	266.2±3.2	S. C. Xue et al.,2016
BS03-4	gabbroic dike	Yinaoxia		Zircon LA-ICP-MS	267.4±3.3	R. G. Zheng et al., 2020
LY-41	gabbro	41°03′46″	95°28′20″	Zircon LA-ICP-MS	270±1	Y. Wang et al., 2017
PY23	dolerite dyke	Poyi		Zircon LA-ICP-MS	270.1±2.1	S. C. Xue et al., 2018
	hornblende gabbro	Poyi		Zircon U-Pb	274±4	C. Y. Jiang et al., 2006
TW02	gabbro	40°35′01″	98°31′47″	Zircon LA-ICP-MS	274.1±5.3	F. Gao et al., 2018a
BS05-1	mafic dike	Yinaoxia		Zircon LA-ICP-MS	276.6±3.3	R. G. Zheng et al., 2020
D1366	gabbro	40°35′56″	98°28′01″	Zircon LA-ICP-MS	276.6±1.7	F. Gao et al., 2018b
LY-122	gabbro	41°04′08″	95°29′13″	Zircon LA-ICP-MS	277±3	Y. Wang et al., 2017
BJS-6	gabbro	Bijiashan		SHRIMP U-Pb	279.2±2.3	K. Z. Qin et al., 2011
BS03-5	mafic dike	Yinaoxia		Zircon LA-ICP-MS	279.7±2.7	R. G. Zheng et al., 2020
LY-108	gabbro	41°00′32″	95°14′38″	Zircon LA-ICP-MS	280±6	Y. Wang et al., 2017
11LBQ05	mafic dike	Lebaquan		Zircon LA-ICP-MS	280±7	D. F. Song et al., 2014
RZ3	mafic rock	Heishanling		SHRIMP U-Pb	280±2	Y. Zheng et al., 2009
BS03-10	mafic dike	Yinaoxia		Zircon LA-ICP-MS	280.4±2.5	R. G. Zheng et al., 2020
	mafic dike	Poyi		SIMS zircon U-Pb	280.5±2.0	S. C. Xue et al.,2016
Y-5	gabbro	Yinaoxia		SHRIMP U-Pb	281±11	R. G. Zheng et al., 2014
	olivine gabbro	Hongshishan		Zircon LA-ICP-MS	281.8±2.6	S. J. Ao et al., 2010
XIIGB30	doleritic dike	Gubaoquan		Zircon LA-ICP-MS	282±6	Y. Y. Zhang et al., 2015
XIIMZ32	doleritic dike	Yinaoxia		Zircon LA-ICP-MS	282±6	Y. Y. Zhang et al., 2015
	gabbro	Luotuoshan		SHRIMP U-Pb	282.6±2.5	J. J. Zhang, 2014
PSZK1-2-650	olivine gabbro	Poyi		SHRIMP U-Pb	284±2.2	K. Z. Qin et al., 2011
17DJQ6-1	Meta-gabbro	Xiaoxigong		Zircon LA-ICP-MS	284±8	R. G. Zheng et al., 2021
LD-4	gabbro	Luodong		Zircon LA-ICP-MS	284±2.3	B. X. Su et al., 2015
GBQ-04	doleritic dike	41°00′43.09″	95°00′21.52″	Zircon LA-ICP-MS	285±4.7	W. B. Gao et al., 2020
DQ43	hornblende gabbro	Liuyuan		Zircon LA-ICP-MS	286±2	Q. G. Mao et al., 2012b
HS139	troctolite	Bijiashan		SIMS zircon U-Pb	286.4±2.8	B. X. Su et al., 2012
C1-2	diabase	Cihai		Zircon LA-ICP-MS	ca. 291.9	J. P. Chen et al., 2013
	olivine norite	Baishan		Zircon LA-ICP-MS	298.4±3.3	X. Xie et al., 2018b
	garnet amphibolite			Zircon LA-ICP-MS	301.9±4.7	W. B. Kang et al., 2020
CH-14	diabase dike	41°08′	93°19′	Zircon LA-ICP-MS	306.9±3.2	Y. H. Wang et al., 2020
TWQ1	diabase dike	Niujuanzi		Zircon LA-ICP-MS	313.6±3.3	Q. Qi et al., 2017
BS095	gabbro	Jijitaizi		Zircon LA-ICP-MS	321.2±5.7	G. Q. Wang, 2015
BS095	gabbro	41°51′00″	95°36′11″	Zircon LA-ICP-MS	321.2±3.7	X. M. Li et al., 2012
09HSS6	gabbro	Hongshishan		Zircon LA-ICP-MS	321.7±3.4	B. X. Su et al., 2011
	hornblendite	Sunjialing		Zircon LA-ICP-MS	339.5±2.6	X. Xie et al., 2018a
TW2005-3	gabbro	42°28'23″	98°03'47″	Zircon LA-ICP-MS	344.6±1.8	W. C. Niu et al., 2020
AB09-60	gabbro	Xiaohuangshan		SHRIMP U-Pb	345±14	R. G. Zheng et al., 2013a
BS023	gabbro	Hongshishan		Zircon LA-ICP-MS	346.6±2.8	G. Q. Wang, 2015, G. Q. Wang et al., 2014
NJ-26A	gabbro	Niujuanzi		Zircon LA-ICP-MS	354±3.3	S. D. Wang et al., 2018a
GS	gabbro	Guaishishan		SHRIMP U-Pb	358.6±3.9	J. G.Yang et al., 2016
DST-1	gabbro	Dashantou		SHRIMP U-Pb	359.3±5.7	H. Q., Yan et al., 2012
BS090	gabbro	Zhangfangshan		Zircon LA-ICP-MS	362.6±4	G. Q. Wang, 2015
TSD	olivine gabbro	Tanshanzi		Zircon LA-ICP-MS	366±2.8	J. P. Yu et al., 2021
BP12-5-1	gabbro	Jidong		Zircon LA-ICP-MS	371.3±2	X. Q. Zhang et al., 2012
RZ1	mafic rock	Heishanling		SHRIMP U-Pb	375±3	Y. Zheng et al., 2009
	olivine hornblende gabbro norite	Hongliugou		SHRIMP U-Pb	396.7±3.8	X. Xie et al., 2015
D1319TW1	gabbro	42°01 ′34 ″	98°45 ′36 ″	Zircon LA-ICP-MS	400.6±3.6	M. Li et al., 2020a
LY-22	gabbro	41°01′32″	95°28′13″	Zircon LA-ICP-MS	404±14	Y. Wang et al., 2017
RZ2	mafic rock	Heishanling		SHRIMP U-Pb	404±3	Y. Zheng et al., 2009
TW6003	gabbro	Xiaoheishan		Zircon LA-ICP-MS	404.9±1.6	Q. Liu et al., 2019;H. D. Chen et al., 2020
	gabbro	Hongliugou		Zircon LA-ICP-MS	405.8±2.9	L. Ma et al., 2018
HSS02	gabbro	Huoshishan		Zircon LA-ICP-MS	410.5±3.7	Z. H. Tian et al., 2014
LJ2020-14	Hornblende gabbro	41°07′03.58″	94°49′13.10″	Zircon LA-ICP-MS	420.7±3.3	This study
XHS	gabbro	Xiaohongshan		SHRIMP U-Pb	424±6	J. G. Yang et al., 2015
	gabbro	Hongliuhe		Zircon LA-ICP-MS	425.5±2.3	F. S. Yu et al., 2006
NJ-28A	diabase	Niujuanzi		Zircon LA-ICP-MS	433.4±3.2	S. D. Wang et al., 2018a
NJ-45A	gabbro	Niujuanzi		Zircon LA-ICP-MS	433.8±3.1	S. D. Wang et al., 2018a
P2-6	gabbro	Mazongshan		Zircon LA-ICP-MS	434.1±3.6	J. X. Wang et al., 2020
10Tzh64	gabbro	Niujuanzi		Zircon LA-ICP-MS	435±1.9	Z. H. Tian et al., 2014
XJ11-139	gabbro	Mingshujing		Zircon LA-ICP-MS	443±1	X. F. Li et al., 2015
BS103	gabbro	Huitongshan		Zircon LA-ICP-MS	446.1±3	G. Q. Wang, 2015
BS025	gabbro	Niujuanzi		Zircon LA-ICP-MS	446.5±4	G. Q. Wang, 2015
BS025	gabbro	41°34′37″	96°38′29″	Zircon LA-ICP-MS	446.5±4	P. Wu et al., 2012
P11TW1	metagabbro	41°45′12″	98°34′08″	Zircon LA-ICP-MS	453±12	Q. T. Meng et al., 2021
P1-3	cumulate gabbro	Mazongshan		Zircon LA-ICP-MS	454.6±2.5	J. X. Wang et al., 2020
P11TW1	gabbro	41°45 ′16 ″	98°34 ′05 ″	Zircon LA-ICP-MS	462.5±3.2	M. Li et al., 2020a
TW2634	gabbro	42°00 ′01 ″	98°01 ′05 ″	Zircon LA-ICP-MS	470.7±4.3	M. Li et al., 2020a
TWD51	peridotite	41°31 ′33 ″	99°22 ′24 ″	Zircon LA-ICP-MS	472.1±4.4	M. Li et al., 2020a
BY4-2	gabbro	41°35'2. 49″	98°24'43. 73″	Zircon LA-ICP-MS	496.4±2.2	L. X. Sun et al., 2017
TW0161	gabbro	Shibanjing		Zircon LA-ICP-MS	498.9±2.4	C. Chen et al., 2017a
XHS10	gabbro	Xiaohuangshan		Zircon LA-ICP-MS	516±8	Y. R. Shi et al., 2018
HLH06-1	cumulate gabbro	Hongliuhe		SHRIMP U-Pb	516.2±7.1	Zhang & Guo, 2008
HLH-124	gabbro	Hongliuhe		SHRIMP U-Pb	520.3±5.8	N. Cleven et al., 2015
YYSS02-2	gabbro	Yushishan		Zircon LA-ICP-MS	521±4	Y. R. Shi et al., 2018
P2TW1	gabbro	Yueyashan		Zircon LA-ICP-MS	527±1.3	X. Z. Hu et al., 2015
HLH14-1	gabbro	Hongliuhe		Zircon LA-ICP-MS	528±3	Y. R. Shi et al., 2018
XCJ04-3	pegmatoid gabbro	Xichangjing		Zircon LA-ICP-MS	535±6	Y. R. Shi et al., 2018
P2TW2	altered pyroxenite	Yueyashan		Zircon LA-ICP-MS	542±1.3	X. Z. Hu et al., 2015
14GBQ1	eclogite	Gubaoquan		Zircon LA-ICP-MS	860±18	W. M. Saktura et al., 2017
B101-14	eclogite	40°59′26″	95°02′24″	Zircon LA-ICP-MS	880±7	X. C. Liu et al., 2011
	eclogite	Gubaoquan		Zircon U-Pb	881±12	J. F. Qu et al., 2011
X11-109-1	plagioclase amphibolite	40° 57.2'	95° 54.0'	Zircon LA-ICP-MS	882±4	H. Y. Jiang et al., 2013
B101-15	eclogite	40°59′26″	95°02′24″	Zircon LA-ICP-MS	889±5	X. C. Liu et al., 2011
17JS102	eclogite	40°59'22.0″	95°02'34.1″	Zircon LA-ICP-MS	889.3±4.8	J. Soldner et al., 2020a
16JS98	amphibolite	40°59'22.0″	95°02'34.1″	Zircon LA-ICP-MS	1378±15	J. Soldner et al., 2020a
16BS095	dolerite dyke	40°38′24″	96°42′48″	Zircon LA-ICP-MS	1405±6	Y. Yuan et al., 2019
X10-4-1	amphibolite	40°2.3′	94°53.9′	Zircon LA-ICP-MS	1987±9	Z. Y. He et al., 2013
Y-14	basalt	Yinaoxia		SHRIMP U-Pb	ca. 265	R. G. Zheng et al., 2014
HLH-1	basalt	Hongliuhe		Laser 40Ar/39Ar whole-rock	277±11	S. Chen et al., 2016
19-6YQ	olivine basalt	40°47′02″	93°08′24″	SHRIMP U-Pb	277±6	Y. H. Li et al., 2012
	basalt	Huoshishan		Zircon LA-ICP-MS	333.1±9.8	L. S. Wang et al., 2009b
AB09-68	basalt	Xiaohuangshan		SHRIMP U-Pb	336.4±4.1	R. G. Zheng et al., 2013a
JDYQ2	spilite, Hongliuyuan Fm.	Xianshuigou		Zircon LA-ICP-MS	359.9±1.4	Z. L. Pan et al., 2017b, C. Chen et al., 2017b
PM06-4206-1	basalt	41°32'36″	98°29'44″	Zircon LA-ICP-MS	396.6±3.3	X. Y. Cheng et al., 2020
YMQ-TW1	basalt,Sangejing Fm.	Yemaquan		Zircon LA-ICP-MS	402.3±1.8	G. H. Tao et al., 2020
BS17-3	basalt	41º24´53.3´´	99º20´16.2´´	Zircon LA-ICP-MS	411.2±3.4	R. G. Zheng et al., 2019
09NC39G	pillow basalt	Hongliuhe		SHRIMP U-Pb	416.6±15	N. R. Cleven et al., 2018
BS067	basalt, Sangejing Fm.	41°20′49″	96°20′22″	Zircon LA-ICP-MS	420±15	X. M. Li et al., 2011
BS20-4	basalt	41º23´26.3´´	99º22´13.6´´	Zircon LA-ICP-MS	434.3±5.2	R. G. Zheng et al., 2019
08LY02	basalt	Liuyuan		SHRIMP U-Pb	451.6±4.4	Q. G. Mao et al., 2012a
TW79	basalt	40°34'49″	99°45'56″	Zircon LA-ICP-MS	901±10	B. R. Wang et al., 2020
	basalt	Huaniushan		Zircon LA-ICP-MS	1071±5	J. G. Yang et al., 2010
References:
An, Y. (2018). Geochemical and tectonic implications of bimodal volcanic rocks in the eastern Beishan Area, Gansu. Master Thesis, Lanzhou University, Lanzhou, Gansu, China. (in Chinese with English Abstract)
Ao, S. J., Xiao, W. J., Han, C. M., Mao, Q. G., & Zhang, J. E. (2010). Geochronology and geochemistry of Early Permian mafic–ultramafic complexes in the Beishan area, Xinjiang, NW China: Implications for late Paleozoic tectonic evolution of the southern Altaids. Gondwana Research, 18(2-3), 466-478. doi:10.1016/j.gr.2010.01.004
Ao, S. J., Xiao, W. J., Han, C. M., Li, X. H., Qu, J. F., Zhang, J. E., Guo, Q. Q., & Tian, Z. H. (2012). Cambrian to early Silurian ophiolite and accretionary processes in the Beishan collage, NW China: implications for the architecture of the Southern Altaids. Geological Magazine, 149(4), 606-625. http://doi.org/10.1017/S0016756811000884
Ao, S. J., Xiao, W. J., Windley, B. F., Mao, Q. G., Han, C. M., Zhang, J. E., Yang, L. K., & Geng, J. Z. (2016). Paleozoic accretionary orogenesis in the eastern Beishan orogen: Constraints from zircon U-Pb and 40Ar/39Ar geochronology. Gondwana Research, 30, 224-235. http://dx.doi.org/10.1016/j.gr.2015.03.004
Bai, R. L., Liu, X. F., & Zhou, H. L. (2020). Genesis and tectonic setting of granite in the central region of the Beishan orogenic belt (Gansu section, China). Acta Petrologica Sinica, 36(6), 1731-1754. (in Chinese with English Abstract)
Bu, T., Yu, J. Y., Guo, L., Wang, G. Q., Guo, L., & Ji, B. (2019). Petrogenesis of the Late Permian granodiorite in southern Dahuoluo area, Beishan, Gansu: Constraints from zircon U-Pb geochronology and geochemistry. Geological Bulletin of China, 38(2-3), 254-265. (in Chinese with English Abstract)
Chen, C., Teng, X. J., Pan, Z. L., Xiu, D., He, J. Y., Zhao, H. P., Zhang, H., Zhang, J. L., & Yang, J. (2020). LA-ICP-MS zircon U-Pb age of A-type granite from the Shibanjing area of middle Beishan orogenic belt, Inner Mongolia, and its constraint on closure time of Beishan Ocean. Geological Bulletin of China, 39(9), 1448-1460. (in Chinese with English Abstract)
Chen, C., Pan, Z. L., Xiu, D., Wei, W. T., Zhang, J. L., Zhang, H., Wang, S., Chang, Z. K., & Wang, R. X. (2017b). Analysis on sedimentary period, depositional environment, and provenance tectonic setting of Hongliuyuan Formation in Beishan area. Acta Sedimentologica Sinica, 35(3), 470-479. (in Chinese with English Abstract)
Chen, C., Xiu, D., Pan, Z. L., Zhang, H., Zhang, J. L., Li, Q. Z., & Zhuan, S. P. (2017a). Early Paleozoic crustal extensional tectonic regime in the central part of Beishan orogenic belt: new evidence from geochronology and geochemistry of gabbro in Shibanjing. Acta Geologica Sinica, 91(8), 1661-1673. (in Chinese with English Abstract)
Chen, H. D., Gao, Y., He, G. Q., Qiu, J. X., & Lu, N. (2020). LA-ICP-MS zircon U-Pb ages and geochemical characteristics of Sangejing gabbro in Beishan area of Inner Mongolia. Geological Survey of China, 7(1), 53-59. (in Chinese with English Abstract)
Chen, H. D., Wang, Z. L., Jing, Y. Z., Gao, Y., Hao, Z. Y., & Lu, N. (2017). Geochemical characteristics and age of rhyolite LA-ICP-MS zircon U-Pb in Fengleishan area of Beishan, Inner Mongolia. Geological Survey of China, 4(5), 48-54. (in Chinese with English Abstract)
Chen, J. P., Liao, Q. A., Luo, T., Zhang, X. H., Guo, D. B., Zhu, H. L., & Liu, X. M. (2013). Zircon U-Pb geochronology and genesis study on the mafic complex from diabase-type iron deposit in Cihai, Beishan area. Geological Science and Technology Information, 32(4), 76-83. (in Chinese with English Abstract)
Chen, S., Guo, Z. J., Qi, J. F., Zhang, Y. Y., Pe-Piper, G., & Piper, D. J. W. (2016). Early Permian volcano-sedimentary successions, Beishan, NW China: Peperites demonstrate an evolving rift basin. Journal of Volcanology and Geothermal Research, 309, 31-44. doi:10.1016/j.jvolgeores.2015.11.004
Chen, X., Wu, Y. S., Zhao, K. D., Zhou, K. F., & Chen, Y. J. (2020). Age, sediment source and tectonic setting of the ore-hosting Jinwozi Formation at the Jinwozi gold deposit in Beishan Orogen, NW China: Evidence from detrital zircon U–Pb ages and Lu–Hf isotopes. Ore Geology Reviews, 117, 103296. doi:10.1016/j.oregeorev.2019.103296
Chen, Y. Y., Li, J., Bai, C. D., Li, D., Zhang, Z. X., & Lin, Y. M. (2019). Geochemical characteristics and zircon U-Pb age of the intermediate and acid volcanic rocks from Yuanbaoshan area in the northern part of Beishan orogenic belt. Geological Bulletin of China, 38(2-3), 266-275. (in Chinese with English Abstract)
Cheng, H. F., Xin, H. T., Liang, G. Q., Zhang, Z. P., Zhang, Y., Feng, Y. P., Zhu, W., Ti, Z. H., & Su, P. T. (2018). Geochemical characteristics and LA-ICP-MS zircon U-Pb age of porphyritic granodiorite in Heihongshan area of Beishan region, Inner Mongolia, and their geological significance. Geological Bulletin of China, 37(10), 1895-1904. (in Chinese with English Abstract)
Cheng, H. F., Xu, X. M., Liu, G., Duan, B. X., Xu, C., & Guan, G. (2017). LA-ICP-MS U-Pb geochronology of detrital zircons from the Gudongjing Complex- Group in Pantuoshan area of Beishan region within Inner Mongolia during Changchengian Period and its geological significance. Geological Bulletin of China, 36(8), 1385-1392. (in Chinese with English Abstract)
Cheng, X. Y., Teng, X. J., Tian, J., & Duan, X. L. (2020). Geochemical characteristics, isotopic ages and tectonic environment of Sangejing Formation in Beishan orogenic belt, Inner Mongolia. Geological Bulletin of China, 39(9), 1461-1473. (in Chinese with English Abstract)
Cleven, N., Lin, S. F., Guilmette, C., Xiao, W. J., & Davis, B. (2015). Petrogenesis and implications for tectonic setting of Cambrian suprasubduction-zone ophiolitic rocks in the central Beishan orogenic collage, Northwest China. Journal of Asian Earth Sciences, 113, 369-390. doi:10.1016/j.jseaes.2014.10.038
Cleven, N. R., Lin, S. F., Xiao, W. J., Davis, D. W., & Davis, B. (2018). Successive arc accretion in the southern Central Asian orogenic belt, NW China: Evidence from two Paleozoic arcs with offset magmatic periods. GSA Bulletin, 130(3-4), 537-557. doi:10.1130/b31434.1
Ding, J. X., Han, C. M., Xiao, W. J., Wang, Z. M., Yang, X. M. (2015). Geochemistry and U-Pb geochronology of tungsten deposit of Huaniushan island arc in the Beishan Orogenic Belt, and its geodynamic background. Acta Petrologica Sinica, 31(2), 594-616. (in Chinese with English Abstract)
Ding, J. X., Han, C. M., Xiao, W. J., Wang, Z. M., & Song, D. F. (2017). Geochronology, geochemistry and Sr-Nd isotopes of the granitic rocks associated with tungsten deposits in Beishan district, NW China, Central Asian Orogenic Belt: Petrogenesis, metallogenic and tectonic implications. Ore Geology Reviews, 89, 441-462. doi:10.1016/j.oregeorev.2017.06.018
Dong, H. K., Meng, Q. T., Liu, G., Duan, X. L., Ti, Z. H., Zhu, W., Xue, P. Y., Chen, H. F., & Ji, T. Y. (2018). Geochemical characteristics of early Silurian granite from Biaoshan Area in Beishan, Inner Mongolia and their tectonic implications. Northwestern Geology, 51(1), 159-174. (in Chinese with English Abstract)
Duan, L. F., Niu, W. C., Zhang, Y., Zhao, Z. L., Zhang, G. Z., Ren, B. F., Li, C. D., & Tu, J. R. (2020). The petrogenesis of quartz diorite (350 Ma) from the Baiheshan area of the Beishan orogenic belt, and its chronological constraint on Hongshishan-Baiheshan Ocean’s subduction initiation. Geological Bulletin of China, 39(9), 1330-1340. (in Chinese with English Abstract)
Feng, J. C., Zhang, W., Wu, T. R., Zheng, R. G., Luo, H. L., & He, Y. K. (2012). Geochronology and Geochemistry of Granite Pluton in the North of Qiaowan, Beishan Mountain, Gansu Province, China, and Its Geological Significance. Acta Scientiarum Naturalium Universitatis Pekinensis, 48(1), 61-70. (in Chinese with English Abstract)
Fu, P. F., Xia, D., Gong, X. P., Sun, Q. L., Yang, Y., Wei, J., & Zhao, Q. (2020). LA-ICP-MS zircon U-Pb age, geochemical characteristics and geological significance of Qingbaishan granite in Beishan area, Xinjiang. Xinjiang Geology, 38(1), 25-31. (in Chinese with English Abstract)
Fu, Y. G., Cai, Y. W., Ma, S. M., Xi, M. J., Gao, J. W., & Wang, Z. L. (2020). Discovery of ∼338 Ma Shibanjing Plagiogranite in the Beishan Area, NW China, and its Geological Significance. Acta Geologica Sinica (English Edition), 94(2), 577-579. doi:10.1111/1755-6724.14520
Gao, F., Jian, K. K., Li, N., Du, B., Zhao, D. C., & Yi, P. F. (2018a). Zircon U-Pb dating and geochemistry of Jijiquan pluton in the eastern section of Beishan orogenic belt and their tectonic implications, Northwestern Geology, 51(3), 1644-1654. (in Chinese with English Abstract)
Gao, F., Jian, K. K., He, Y. F., Li, N., Yi, P. F., Liu, X. W., & Tang, L. (2018b). Genesis and metallogenic epoch constraints of Luzuizi antimony deposit of Beishan, Inner Mongolia. Mineral Exploration, 9(9), 1644-1654. (in Chinese with English Abstract)
Gao, W. B., Qian, Z. Z., Xu, G., Duan, J., Shi, Z., Ma, B. P., & Yang, T. (2020). Geochemical characteristics of Gubaoquan dolerite dykes in Beishan area of Gansu, China and their geological significance. Journal of Earth Sciences and Environment, 42(5), 622-636. (in Chinese with English Abstract)
Gao, Y., Ding, H. L., Guo, R. J., Liu, Y. Y., & Wang, J. B. (2016). Structural deformation of Gonglujing-Sangejing ductile shear zone in the Beishan orogenic belt, and its geological significance. Geological Survey of China, 3(1), 26-34. (in Chinese with English Abstract)
Guan, S., Ren, E. F., Zhao, H. B., Zhu, X. L., Cheng, L., & Wang, H. Y. (2019). LA-ICP-MS zircon U-Pb age and geochemical characteristics of granodiorite in Beishan area, Gansu Province. Journal of Qinghai University, 37(2), 92-99. (in Chinese with English Abstract)
Guo, F., Wang, H. J., Liu, J., & Wang, W. H. (2020). Geochronology, geochemistry of the Shenjing syenitegranite in Mazongshan area, Beishan Mountain, and its geological significance. Modern Mining, 36(12), 24-30. (in Chinese with English Abstract)
Guo, L., Wang, G. Q., Guo, L., & Bu, T. (2018). Petrogenesis of Early Triassic felsic dikes in the Lucaogou area of southern Beishan Orogenic Belt. Bulletin of Mineralogy, Petrology and Geochemistry, 37(3), 502-512. (in Chinese with English Abstract)
Guo, Q. Q., Chung, S. L., Xiao, W. J., Hou, Q. L., & Li, S. (2017). Petrogenesis and tectonic implications of Late Devonian arc volcanic rocks in southern Beishan orogen, NW China: Geochemical and Nd–Sr–Hf isotopic constraints. Lithos, 278-281, 84-96. doi:10.1016/j.lithos.2017.01.017
Guo, Q. Q., Xiao, W. J., Hou, Q. L., Windley, B. F., Han, C. M., Tian, Z. H., & Song, D. F. (2014). Construction of Late Devonian Dundunshan arc in the Beishan orogen and its implication for tectonics of southern Central Asian Orogenic Belt. Lithos, 184-187, 361-378. http://dx.doi.org/10.1016/j.lithos.2013.11.007
Hao, Z. Y., Gao, J., Wang, C., Liu, X. D., Li, D. C., & Wang, X. L. (2020). LA-ICP-MS zircon U-Pb dating and tectonic setting of the monzogranites in the Fengleishan area of Beishan orogenic belt, Inner Mongolia. Geology in China, 47(4), 1204-1219. (in Chinese with English Abstract)
He, Z. Y., Sun, L. X., Mao, L. J., Zong, K. Q., & Zhang, Z. M. (2015). Zircon U-Pb and Hf isotopic study of gneiss and granodiorite from the southern Beishan orogenic collage: Mesoproterozoic magmatism and crustal growth. Chin Sci Bull, 60, 389-399. (in Chinese with English Abstract)
He, Z. Y., Zhang, Z. M., Zong, K. Q., & Dong, X. (2013). Paleoproterozoic crustal evolution of the Tarim Craton: Constrained by zircon U–Pb and Hf isotopes of meta-igneous rocks from Korla and Dunhuang. Journal of Asian Earth Sciences, 78, 54-70. doi:10.1016/j.jseaes.2013.07.022
He, Z. Y., Zong, K. Q., Jiang, H. Y., Xiang, H., & Zhang, Z. M. (2014). Early Paleozoic tectonic evolution of the southern Beishan orogenic collage: Insights from the granitoids. Acta Petrologica Sinica, 30(8), 2324-2338. (in Chinese with English Abstract)
Hou, Q. Y., Wang, Z., Liu, J. B., Wang, J., & Li, D. P. (2012). Geochemistry characteristics and SHRIMP dating of Yueyashan ophiolite in Beishan Orogen. Geoscience, 26(5), 1008-1018. (in Chinese with English Abstract)
Hou, T., Zhang, Z., Santosh, M., Encarnacion, J., & Wang, M. (2013). The Cihai diabase in the Beishan region, NW China: Isotope geochronology, geochemistry and implications for Cornwall-style iron mineralization. Journal of Asian Earth Sciences, 70-71, 231-249. doi:10.1016/j.jseaes.2013.03.016
Hu, X. Z., Zhao, G. C., Hu, X. Y., Liao, Y. F., & Cheng, H. F. (2015). Geological characteristics, formation epoch and geotectonic significance of the Yueyashan ophiolitic tectonic mélange in Beishan area, Inner Mongolia. Geological Bulletin of China, 34(2-3), 425-436. (in Chinese with English Abstract)
Huang, B. T., Wang, G. Q., Bu, T., Guo, L., Dong, Z. C., Wang, J. L., & He, Z. Y. (2021). Petrogenesis and tectonic significance of the Silurian granites in Yemadaquan area, Beishan, Gansu Province. Earth Science, in press. (in Chinese with English Abstract)
Hui, W. D., Zhu, J., Deng, J., Lv, X. B., Mo, Y. L., & Li, C. C. (2013). U-Pb geochronology and geochemical characteristics of rhyolite porphyry in the Baishantang mine, Beishan, Gansu and their geological implications. Geology and Exploration, 49(3), 484-495. (in Chinese with English Abstract)
Jia, Y. Q., Zhao, Z. X., Xu, H., Wang, X. L., Liu, Q., & Wang, J. R. (2016). Zircon LA-ICP-MS U-Pb dating of and tectonic setting of rhyolites from Baishan Formation in Fengleishan area of the Beishan orogenic belt. Geology in China, 43(1), 91-98. (in Chinese with English Abstract)
Jiang, C. Y., Cheng, S. L., Ye, S. F., Xia, M. Z., Jiang, H. B., & Dai, Y. C. (2006). Lithogeochemistry and petrogenesis of Zhongposhanbei mafic rock body, at Beishan region, Xinjiang. Acta Petrologica Sinica, 22(1), 115-126. (in Chinese with English Abstract)
Jiang, H. Y., He, Z. Y., Zong, K. Q., Zhang, Z. M., & Zhao, Z. D. (2013). Zircon U-Pb dating and Hf isotopic studies on the Beishan complex in the southern Beishan orogenic belt. Acta Petrologica Sinica, 29(11), 3949-3967. (in Chinese with English Abstract)
Jin, Y. H., Chang, L., Ji, G., Jia, Y. M., Zhang, P., & Yan, D. H. (2020). Chemical characteristics and metallogenic indications of intrusive rocks in Hongliudaquan area of Beishan. Mineral Exploration, 11(1), 10-20. (in Chinese with English Abstract)
Kang, W. B., Li, W., Kang, L., Dong, Y. P., Jiang, D. Z., Liang, J. W., & Dong, H. Q. (2020). Metamorphism and geochronology of garnet amphibolite from the Beishan Orogen, southern Central Asian Orogenic Belt: Constraints from P-T path and zircon U-Pb dating. Geoscience Frontiers, 11(4), 1189-1201. doi:10.1016/j.gsf.2019.10.007
Li, J., Tian, Y., Ban, C. Y., Feng, Y. P., Chen, Y. Y., & Li, J. H. (2019). Geochemical characteristics and chronology of early Late Carboniferous granites in Yuanbaoshan area，Beishan region. Acta Petrologica et Mineralogica, 38(2), 145-159. (in Chinese with English Abstract)
Li, M., Ren, B. F., Teng, X. J., Zhang, Y., Duan, X. L., Niu, W. C., & Duan, L. F. (2018). Geochemical characteristics, zircon U-Pb age and Hf isotope and geological significance of granitoid in Beishan orogenic belt. Earth Science, 43(12), 4586-4605. (in Chinese with English Abstract)
Li, M., Ren, B. F., Duan, X. L., Tian, J., Duan, L. F., & Niu, W. C. (2020c). Petrogenesis of Triassic granites in Xiaohongshan area, Beishan orogenic belt: Constraints from zircon U-Pb ages and Hf isotopes. Geological Bulletin of China, 39(9), 1422-1435. (in Chinese with English Abstract)
Li, M., Xin, H. T., Tian, J., Meng, X. F., Pan, Z. L., Chen, C., & Liang, G. Q. (2020a). Composition, age and polarity of Gongpoquan arc and its tectonic significance in Beishan Orogen. Earth Science, 45(7), 2393-2412. (in Chinese with English Abstract)
Li, M., Xin, H. T., Ren, B. F., Ren, Y. W., & Liu, W. G. (2020b). Early–Middle Permian post-collisional granitoids in the northern Beishan orogen, northwestern China: evidence from U–Pb ages and Sr–Nd–Hf isotopes. Canadian Journal of Earth Sciences, 57(6), 681-697. http://dx.doi.org/10.1139/cjes-2019-0088
Li, S., Wang, T., Tong, Y., Hong, D. W., & Ou Yang, Z. X. (2009). Identification of the Early Devonian Shuangfengshan A-type granites in Liuyuan area of Beishan and its implications to tectonic evolution. Acta Petrologica et Mineralogica, 28(5), 407-422. (in Chinese with English Abstract)
Li, S., Wang, T., Tong, Y., Wang, Y. B., Hong, D. W., & Ou Yang, Z. X. (2011). Zircon U-Pb age, origin and its tectonic significances of Huitongshan Devonian K-feldspar granites from Beishan orogen, NW China. Acta Petrologica Sinica, 27(10), 3055-3070. (in Chinese with English Abstract)
Li, S., Wang, T., Wilde, S. A., Tong, Y., Hong, D. W., & Guo, Q. Q. (2012). Geochronology, petrogenesis and tectonic implications of Triassic granitoids from Beishan, NW China. Lithos, 134-135, 123-145. doi:10.1016/j.lithos.2011.12.005
Li, S., Wilde, S. A., & Wang, T. (2013). Early Permian post-collisional high-K granitoids from Liuyuan area in southern Beishan orogen, NW China: Petrogenesis and tectonic implications. Lithos, 179, 99-119. http://dx.doi.org/10.1016/j.lithos.2013.08.002
Li, W. C., Zhao, P. B., Luo, Q. Z., Peng, H. L., Zhou, D., Gao, F., & Zhao, D. C. (2018). Geological characteristics and mineralization age constraint of the Wangxushan tungsten deposit in Beishan, Inner Mongolia. Geology and Exploration, 54(4), 659-673. (in Chinese with English Abstract)
Li, X. F. (2013). Age, geochmical and geological implications of Paleozoic granitoids in the Mazongshan region. Master’s thesis, Northwest University. (in Chinese with English Abstract)
Li, X. F., Zhang, C. L., Li, L., Bao, Z. A., Zhang, B. L., & Wei, Q. (2015). Formation age, geochemical characteristics of the Mingshujing pluton in Beishan area of Gansu Province and its geological significance. Acta Petrologica Sinica, 31(9), 2521-2538. (in Chinese with English Abstract)
Li, X. M., Yu, J. Y., Wang, G. Q., Wu, P., & Zhou, Z. Q. (2011). LA-ICP-MS zircon U-Pb dating of Devonian Sangejing Formation and Dundunshan Group in Hongliuyuan, Beishan area, Gansu Province. Geological Bulletin of China, 2011, 30(10), 1501-1507. (in Chinese with English Abstract)
Li, X. M., Yu, J. Y., Wang, G. Q., & Wu. P. (2012). Geochronology of Jijitaizi ophiolite in Beishan area, Gansu Province, and its geological significance. Geological Bulletin of China, 31(12), 2025-2031. (in Chinese with English Abstract)
Li, Y. H., Yang, X. K., Wang, Q. L., Cui, D. X., Ji, L. Y., & Hao, M. (2012). Redetermination of the volcanic eruption time and analysis of geochemical characteristics of volcanic rocks in eastern Maotoushan of Beishan area, Xinjiang. Geology in China, 39(3), 683-694. (in Chinese with English Abstract)
Li, Z., Zhu, W. B., & Wu, H. L. (2019). Structural characteristics and chronological constraints on the Yemaquan-Lebaquan ductile shear zone in Mazongshan area, Beishan. Geological Journal of China Universities, 25(6), 932-942. (in Chinese with English Abstract)
Liang, G. B., Ding, S. P., Li, Z. C., Li, R. B., Wang, M., Chen, Y. X., & Pei, X. Z. (2017). Geochronology and geochemistry of Early Devonian-Late Silurian mylonitized quartz diorites from the southern Xiaoxigong in the Beishan area of Gansu Province and their geologic implications. Northwestern Geology, 50(1), 249-260. (in Chinese with English Abstract)
Liang, J. W., Chen, Y. L., Zhang, W. Q., Wang, G. Q., Yu, J. Y., & Li, X. M. (2014). Detrital zircon dating of Devonian and geological significance of the Devonian Sangejing Formation in Beishan area, Gansu Province. Geological Science and Technology Information, 33(3), 1-9. (in Chinese with English Abstract)
Liu, M. Q., Wang, J. J., & Dai, W. J. (2006). The U-Pb age of single-grained zircon from Maanshanbei granite in Hongshishan area of the Beishan orogenic belt, Gansu Province. Acta Petrologica et Mineralogica, 25(6), 473-479. (in Chinese with English Abstract)
Liu, M. Q., & Zhu, Y. X. (2018). Zircon LA-ICP-MS U-Pb dating of the porphyritic monzonitic granite from southwest Hongyanjing in Beishan area, Gansu Province and its significance. Northwestern Geology, 51(1), 23-33. (in Chinese with English Abstract)
Liu, Q., Zhao, G. C., Sun, M., Eizenhöfer, P. R., Han, Y. G., Hou, W. Z., Zhang, X. R., Wang, B., Liu, D. X., & Xu, B. (2015). Ages and tectonic implications of Neoproterozoic ortho- and paragneisses in the Beishan Orogenic Belt, China. Precambrian Research, 266, 551-578. http://dx.doi.org/10.1016/j.precamres.2015.05.022
Liu, Q., Zhao, Z. X., Jia, Y. Q., Xu, H., Wang, X. L., & Gao, J. (2019). Geochemical characteristics and LA-ICP-MS zircon U-Pb age of the gabbro in Xiaoheishan of Beishan area, Inner Mongolia. Geological Survey of China, 6(1), 41-47. (in Chinese with English Abstract)
Liu, X. C., Chen, B. L., Jahn, B., Wu, G. G., & Liu, Y. S. (2011). Early Paleozoic (ca. 465 Ma) eclogites from Beishan (NW China) and their bearing on the tectonic evolution of the southern Central Asian Orogenic Belt. Journal of Asian Earth Sciences, 42, 715-731. http://doi.org/10.1016/j.jseaes.2010.10.017
Liu, X. M., Chen, Y. L., Li, D. P., Wang, Z., & Liu, J. B. (2010). The U-Pb ages and Hf isotopes of zircons in the metadiabase and gneissic granite, Beishan orogenic belt, Inner Mongolia, China and its significance. Geological Bulletin of China, 29(4), 518-529. (in Chinese with English Abstract)
Lu, J. C., Niu, Y. Z., Wei, X. Y., Chen, G. C., & Li, Y. H. (2013). LA-ICP-MS zircon U-Pb dating of the Late Paleozoic volcanic rocks from the Hongshishan area of the Beishan orogenic belt and its tectonic significances. Acta Petrologica Sinica, 29(8), 2685-2694. (in Chinese with English Abstract)
Lv, C. L., Yang, F. Q., Luo, J. S., Ma, W. F., Liu, W. X., & Shi, W. M. (2021). Isotopic age of rock mass in Gongpoquan mining area in Beishan of Gansu and its geological significance. Mineral Resources and Geology, 35(1), 83-89. (in Chinese with English Abstract)
Ma, L., Wei, H. F., Wang, H. T., Yang, J., Huo, Y. H., & Zhai, X. W. (2018). Geochemistry, zircon U-Pb chronology and tectonic significance of gabbro in the Hongliugou area in Gansu Province. Journal of Lanzhou University: Natural Sciences, 54(1), 59-67. (in Chinese with English Abstract)
Mao, J. W., Pirajno, F., Zhang, Z. H., & Wan, Y. S. (2012). SHRIMP Zircon U-Pb dating of alkaline dykes in the Pobei Area, Beishan rift, Xinjiang Autonomous Region, China: Implications for tectonic setting and mantle plume events. Acta Geologica Sinica (English Edition), 86(4), 879-884.
Mao, Q. G., Xiao, W. J., Han, C. M., Sun, M., Yuan, C., Zhang, J. E., Ao, S. J., & Li, J. L. (2010). Discovery of Middle Silurian adakite granite and its tectonic significance in Liuyuan area, Beishan Mountains, NW China. Acta Petrologica Sinica, 26(2), 584-596. (in Chinese with English Abstract)
Mao, Q. G., Xiao, W. J., Fang, T. H., Wang, J. B., Han, C. M., Sun, M., & Yuan, C. (2012a). Late Ordovician to early Devonian adakites and Nb-enriched basalts in the Liuyuan area, Beishan, NW China: Implications for early Paleozoic slab-melting and crustal growth in the southern Altaids. Gondwana Research, 22, 534-553. http://doi.org/10.1016/j.gr.2011.06.006
Mao, Q. G., Xiao, W. J., Windley, B. F., Han, C. M., Qu, J. F., Ao, S. J., Zhang, J. E., & Guo, Q. Q. (2012b). The Liuyuan complex in the Beishan, NW China: a Carboniferous–Permian ophiolitic fore-arc sliver in the southern Altaids. Geological Magazine, 149(3), 483-506. http://doi.org/10.1017/S0016756811000811
Meng, Q. T., Zhang, Z. P., Dong, H. K., & Xu, C. (2021). Chronology, geochemical characteristics and tectonic significance of Aminwusu ophiolite in the Beishan area, Inner Mongolia. Geology and Exploration, 57(1), 122-135. (in Chinese with English Abstract)
Niu, W. C., Ren, B. F., Ren, Y. W., Duan, X. L., Duan, L. F., Sun, L. X., Li, M., & Zhang, J. H. (2019). Neoproterozoic magmatic records in the North Beishan Orogenic Belt: evidence of the gneissic granites from the Hazhu area, Inner Mongolia. Earth Science, 44(1), 284-297. (in Chinese with English Abstract)
Niu, W. C., Xin, H. T., Duan, L. F., Zhao, Z. L., Zhang, G. Z., Ren, B. F., & Zhang, Y. (2020). Geochemical characteristics, zircon U-Pb age of SSZ ophiolite in the Baiheshan area of the Beishan orogenic belt, Inner Mongolia, and its indication for the evolution of the Paleo-Asian Ocean. Geological Bulletin of China, 39(9), 1317-1329. (in Chinese with English Abstract)
Niu, Y. Z., Lu, J. C., Wei, J. S., Chen, G. C., Shi, J. Z., & Wu, J. (2014). Chronology of the Lvtiaoshan Formation in the Beishan area and its tectonic significances. Geological Review, 60(3), 567-575. doi:10.16509/j.georeview.2014.03.009
Niu, Y. Z., Lu, J. C., Liu, C. Y., Xu, W., Shi, J. Z., & Song, B. (2018a). Geochronology and distribution of the Upper Carboniferous-Lower Permian Ganquan Formation in the Beishan Region, northwestern China and its tectonic implication. Geological Review, 64(4), 1131-1148. (in Chinese with English Abstract)
Niu, Y. Z., Lu, J. C., Liu, C. Y., Song, B., Shi, J. Z., & Xu, W. (2018b). Chronostratigraphy and regional comparison of marine Permian System in the Beishan Region, North China. Acta Geologica Sinica, 92(6), 1131-1148. (in Chinese with English Abstract)
Niu, Y. Z., Shi, G. R., Wang, J. Q., Liu, C. Y., Zhou, J. L., Lu, J. C., Song, B., & Xu, W. (2021). The closing of the southern branch of the Paleo-Asian Ocean: Constraints from sedimentary records in the southern Beishan Region of the Central Asian Orogenic Belt, NW China. Marine and Petroleum Geology, 124, 104791. doi:10.1016/j.marpetgeo.2020.104791
Niu, Y. Z., Song, B., Zhou, J. L., Xu, W., Shi, J. Z., Zhang, Y. X., & Lu, J. C. (2020). Lithofacies and chronology of volcano-sedimentary sequence in the southern Beishan Region, Central Asian Orogenic Belt and its paleogeographical implication. Acta Geologica Sinica, 94(2), 615-633. (in Chinese with English Abstract)
Niu, Y. Z., Wei, J. S., Shi, J. Z., & Chen, G. C. (2013). LA-ICP-MS zircon U-Pb dating of the Upper Carboniferous volcanic rocks from northern Beishan region in Gansu Province and its tectonic significance. Geological Bulletin of China, 32(11), 1720-1727. (in Chinese with English Abstract)
Pan, Z. L., Wang, S., Qiu, Z., Zhang, H., Zhang, J. L., Tian, F. Y., Li, Q. Z., & Ji, H. (2017b). Geochemistry, zircon U-Pb ages and Hf isotopes of the Early Carboniferous Hongliuyuan volcanic rocks in Xianshuigou, Beishan area, Inner Mongolia. Geological Survey and Research, 40(2), 99-108. (in Chinese with English Abstract)
Pan, Z. L., Zhang, H., Chen, C., Wang, S., Zhang, J. L., Tian, F. Y., Liu, C., Zhang, L. G., & Li, Q. Z. (2017a). Zircon U-Pb geochronology and Lu-Hf isotope compositions of porphyritic syenite granite from Aobaohuturen in Beishan, Inner Mongolia and its tectonic implication. Chinese Journal of Geology, 52(1), 301-316. (in Chinese with English Abstract)
Qi, Q., Wang, Y. H., Yu, J. Y., Liu, D. M., Guo, L., Ji, B., Feng, M. X., Yang, J. G., & Wang, L. (2017). Geochronology, geochemistry and tectonic significance of diabase dike swarms in Beishan, Gansu. Xinjiang Geology, 35(1), 99-106. (in Chinese with English Abstract)
Qin, K. Z., Su, B. X., Sakyi, P. A., Tang, D. M., Li, X. H., Sun, H., Xiao, Q. H., & Liu, P. P. (2011). SIMS zircon U-Pb geochronology and Sr-Nd isotopes of Ni-Cu-bearing mafic-ultramafic intrusions in eastern Tianshan and Beishan in correlation with flood basalts in Tarim Basin (NW China): constraints on a ca. 280 Ma mantle plume. American Journal of Science, 311, 237-260. doi:10.2475/03.2011.03
Qu, C. X., Yang, X. K., He, H. J., Gao, P., & Song, H. Y. (2013). Geochemical features and ages of the intrusive rocks from Yantan belt in Beishan area of Xinjiang and their geological implications. Geology in China, 40(5), 1409-1420. (in Chinese with English Abstract)
Qu, J. F., Xiao, W. J., Windley, B. F., Han, C. M., Mao, Q. G., Ao, S. J., & Zhang, J. E. (2011). Ordovician eclogites from the Chinese Beishan: implications for the tectonic evolution of the southern Altaids. Journal of Metamorphic Geology, 29, 803-820. http://doi.org/10.1111/j.1525-1314.2011.00942.x
Ren, B. F., Ren, Y. W., Niu, W. C., Duan, L. F., Sun, L. X., Li, M., Tian, J., Duan, X. L., & Zhang, Y. Q. (2019). Zircon U-Pb ages and Hf isotope characteristics of the volcanic rocks from Queershan Group in the Hazhudongshan area of Beishan, Inner Mongolia and their geological significance. Earth Science, 44(1), 298-311. (in Chinese with English Abstract)
Ren, Y. W., Ren, B. F., Niu, W. C., Sun, L. X., Li, M., Zhang, K., Zhang, J. H., & Duan, L. F. (2019). Carboniferous volcanics from the Beishan formation in the Hazhu area, Inner Mongolia: implications for the Late Paleozoic active continental margin magmatism in the Northern Beishan. Earth Science, 44(1), 312-327. (in Chinese with English Abstract)
Saktura, W. M., Buckman, S., Nutman, A. P., Belousova, E. A., Yan, Z., & Aitchison, J. C. (2017). Continental origin of the Gubaoquan eclogite and implications for evolution of the Beishan Orogen, Central Asian Orogenic Belt, NW China. Lithos, 294-295, 20-38. doi:10.1016/j.lithos.2017.10.004
Shan, L., Xu, R. K., Zheng, Y. Y., Zhang, Y. L., Cao, L., & Pang, Y. C. (2013). Zircon LA-ICP-MS U-Pb chronology of magmatic rock in the Baishantang copper polymetallic deposit of Beishan area, Northwest China. Geology in China, 40(5), 1600-1611. (in Chinese with English Abstract)
Shi, Y. R., Zhang, W., Kröner, A., Li, L. L., & Jian, P. (2018). Cambrian ophiolite complexes in the Beishan area, China, southern margin of the Central Asian Orogenic Belt. Journal of Asian Earth Sciences, 153, 193-205. doi:10.1016/j.jseaes.2017.05.021
Soldner, J., Yuan, C., Schulmann, K., Štípská, P., Jiang, Y., Zhang, Y., & Wang, X. (2020a). Grenvillean evolution of the Beishan Orogen, NW China: Implications for development of an active Rodinian margin. GSA Bulletin, 132(7-8), 1657-1680. doi:10.1130/b35404.1
Song, D. F., Xiao, W. J., Han, C. M., Li, J. L., Qu, J. F., Guo, Q. Q., Li, L. N., & Wang, Z. M. (2013a). Progressive accretionary tectonics of the Beishan orogenic collage, southern Altaids: Insights from zircon U–Pb and Hf isotopic data of high-grade complexes. Precambrian Research, 227, 368-388. http://dx.doi.org/10.1016/j.precamres.2012.06.011
Song, D. F., Xiao, W. J., Han, C. M., & Tian, Z. H. (2013b). Geochronological and geochemical study of gneiss-schist complexes and associated granitoids, Beishan Orogen, southern Altaids. International Geology Review, 55(14), 1705-1727. http://dx.doi.org/10.1080/00206814.2013.792515
Song, D. F., Xiao, W. J., Han, C. M., Tian, Z. H., & Wang, Z. M. (2013c). Provenance of metasedimentary rocks from the Beishan orogenic collage, southern Altaids: Constraints from detrital zircon U-Pb and Hf isotopic data. Gondwana Research, 24(3-4), 1127-1151. doi:10.1016/j.gr.2013.02.002
Song, D. F., Xiao, W. J., Han, C. M., & Tian, Z. H. (2014). Polyphase deformation of a Paleozoic forearc–arc complex in the Beishan orogen, NW China. Tectonophysics, 632, 224-243. doi:10.1016/j.tecto.2014.06.030
Song, D. F., Xiao, W. J., Windley, B. F., Han, C. M., & Tian, Z. H. (2015). A Paleozoic Japan-type subduction-accretion system in the Beishan orogenic collage, southern Central Asian Orogenic Belt. Lithos, 224-225, 195-213. doi:10.1016/j.lithos.2015.03.005
Song, D. F., Xiao, W. J., Windley, B. F., Han, C. M., & Yang, L. (2016). Metamorphic complexes in accretionary orogens: Insights from the Beishan collage, southern Central Asian Orogenic Belt. Tectonophysics, 688, 135-147. http://dx.doi.org/10.1016/j.tecto.2016.09.012
Su, B. X., Qin, K. Z., Sun, H., & Wang, H. (2010). Geochronological, petrological, mineralogical and geochemical studies of the Xuanwoling mafic-ultramafic intrusion in Beishan area, Xinjiang. Acta Petrologica Sinica, 26(11), 3283-3294. (in Chinese with English Abstract)
Su, B. X., Qin, K. Z., Sakyi, P. A., Liu, P. P., Tang, D. M., Malaviarachchi, S. P. K., Xiao, Q. H., Sun, H., Dai, Y. C., & Hu, Y. (2011). Geochemistry and geochronology of acidic rocks in the Beishan region, NW China: Petrogenesis and tectonic implications. Journal of Asian Earth Sciences, 41(1), 31-43. doi:10.1016/j.jseaes.2010.12.002
Su, B. X., Qin, K. Z., Sakyi, P. A., Tang, D. M., Liu, P. P., Malaviarachchi, S. P. K., Xiao, Q. H., & Sun, H. (2012). Geochronologic-petrochemical studies of the Hongshishan mafic-ultramafic intrusion, Beishan area, Xinjiang (NW China): petrogenesis and tectonic implications. International Geology Review, 54(3), 270-289. doi:10.1080/00206814.2010.543011
Su, B. X., Qin, K. Z., Lu, Y. H., Sun, H., & Sakyi, P. A. (2015). Decoupling of whole-rock Nd-Hf and zircon Hf-O isotopic compositions of a 284 Ma mafic-ultramafic intrusion in the Beishan Terrane, NW China. International Journal of Earth Sciences, 104(7), 1721-1737. doi:10.1007/s00531-015-1168-0
Sun, H. R., Lv, Z. C., Yu, X. F., Li, Y. S., Du, Z. Z., Lv, X., Du, Y. L., & Gong, F. Y. (2020a). Early Mesozoic tectonic evolution of Beishan Orogenic Belt: Constraints from chronology and geochemistry of the Late Triassic diabase dyke in Liuyuan area, Gansu Province. Acta Petrologica Sinica, 36(6), 1755-1768. (in Chinese with English Abstract)
Sun, H. R., Lv, Z. C., Yu, X. F., Li, Y. S., Du, Z. Z., Lv, X., & Gong, F. Y. (2020b). Late Paleozoic tectonic evolution of Beishan orogenic belt: chronology and geochemistry constraints of Early Permian syenogranitic porphyry dyke in Liuyuan area, Gansu Province. Journal of Jilin University (Earth Science Edition), 50(5), 1433-1449. (in Chinese with English Abstract)
Sun, L. X., Zhang, J. H., Ren, B. F., Niu, W. C., Ren, Y. W., & Zhang, K. (2017). Geochemical characteristics and U-Pb age of Baiyunshan ophiolite mélange in the Beishan orogenic belt and their geological implications. Acta Petrologica et Mineralogica, 36(2), 131-147. (in Chinese with English Abstract)
Sun, Q. L., Xia, D., & Gong, X. P. (2020). Genesis and tectonic environment of Qingbaishan granite in Beishan, Xinjiang. Xinjiang Geology, 38(3), 298-304. (in Chinese with English Abstract)
Sun, X. C., Wang, H. T., Li, T. G., Wei, H. F., Xu, L., Wang, X. W. (2021). LA-ICP-MS zircon U-Pb ages of the granodiorites from Shuangfengshan in Beishan Mountain, Gansu Province, and its tectonic significance. Acta Petrologica et Mineralogica, 40(2), 171-184. (in Chinese with English Abstract)
Tao, G. H., Li, X. F., Chen, W. L., Chen, W., Lu, G., Hao, C., Pan, S., & Wu, K. N. (2020). The Geochemical characteristics and tectonic of Devonian bimodal volcanic rocks in Yemaquan area, Beishan area, Inner Mongolia and their implications for early Paleozoic tectonic evolution in Beishan. Geological Bulletin of China, in press. (in Chinese with English Abstract)
Tian, J., Teng, X. J., Xin, H. T., Duan, X. L., Cheng, X. Y., Zhang, Y., & Ren, B. F. (2020a). Structure, composition and ages of ophiolitic mélanges in the Baiyunshan area, Beishan Orogenic Belt. Acta Petrologica Sinica, 36(12), 3741-3756. (in Chinese with English Abstract)
Tian, J., Xin, H. T., Teng, X. J., Duan, X. L., Cheng, X. Y., Zhang, Y., & Ren, B. F. (2020b). The determination of volcanic rocks in Upper Devonian Dundunshan formation in the Baiyunshan area of Beishan orogenic belt, Inner Mongolia. Acta Petrologica Sinica, 36(2), 509-525. (in Chinese with English Abstract)
Tian, J., Xin, H. T., Teng, X. J., Duan, X. L., Cheng, X. Y., Zhang, Y., & Ren, B. F. (2020c). The tectonic implication of Hongliuhe‐Xichangjing ophiolitic mélanges belt in the central of Beishan Orogen, NW China—constraints by the U‐Pb ages of detrital zircons of the metasandstones. Acta Geologica Sinica - English Edition, 94(4), 1256-1275. doi:10.1111/1755-6724.14571
Tian, Y., Li, J., Ban, C. Y., Yang, J. Y., & Zhou, J. (2020). Petrogeochemistry of Late Permian calc-alkaline intrusive rocks in Tamusu area of Alxa and its significances. China Mining Magazine, 29(Suppl. 1), 251-255. (in Chinese with English Abstract)
Tian, Z. H., Xiao, W. J., Shan, Y. H., Windley, B., Han, C. H., Zhang, J. E., & Song, D. F. (2013). Mega-fold interference patterns in the Beishan orogen (NW China) created by change in plate configuration during Permo-Triassic termination of the Altaids. Journal of Structural Geology, 52, 119-135. doi:10.1016/j.jsg.2013.03.016
Tian, Z. H., Xiao, W. J., Windley, B. F., Lin, L. N., Han, C. M., Zhang, J. E., Wan, B., Ao, S. J., Song, D. F., & Feng, J. Y. (2014). Structure, age, and tectonic development of the Huoshishan–Niujuanzi ophiolitic mélange, Beishan, southernmost Altaids. Gondwana Research, 25, 820-841. http://dx.doi.org/10.1016/j.gr.2013.05.006
Tian, Z. H., Xiao, W. J., Sun, J. M., Windley, B. F., Glen, R., Han, C. M., Zhang, Z. Y., Zhang, J. E., Wan, B., Ao, S. J., & Song, D. F. (2015). Triassic deformation of Permian Early Triassic arc-related sediments in the Beishan (NW China): Last pulse of the accretionary orogenesis in the southernmost Altaids. Tectonophysics, 662, 363-384. doi:10.1016/j.tecto.2015.01.009
Tian, Z. H., Xiao, W. J., Windley, B. F., Huang, P., Zhang, J. E., Ao, S. J., Zhang, Z. Y., Song, D. F., & Liu, F. L. (2021). Two key switches in regional stress field during multi-stage deformation in the Carboniferous−Triassic southernmost Altaids (Beishan, NW China): Response to orocline-related roll-back processes. GSA Bulletin. doi:10.1130/b35898.1
Wang, B. R., Yang, X. S., Li, S. C., Teng, C., Yang, X. J., Huang, F. Y., Cao, J., Yang, B., Zhang, X. F., & Zhou, Y. (2020). Age, depositional environment, and tectonic significance of an Early Neoproterozoic volcano‐sedimentary sequence in the eastern Beishan orogenic belt, southern Central Asian Orogenic Belt. Geological Journal, 56(3), 1346-1357. doi:10.1002/gj.3985
Wang, B. R., Yang, X. S., Li, S. C., Teng, C., Yang, X. J., Huang, F. Y., Zhang, X. F., Cao, J., Zhou, Y., Zhang, H. C., & Li, J. (2021). Geochronology, geochemistry, and tectonic implications of early Neoproterozoic granitic rocks from the eastern Beishan Orogenic Belt, southern Central Asian Orogenic Belt. Precambrian Research, 352, 106016. doi:10.1016/j.precamres.2020.106016
Wang, G. Q. (2015). The research of the Paleozoic ophiolites and volcanic rocks and the tectonic evolution in the Beishan area (Northwest China). PhD Thesis, Chang’an University, Xi’an, China. (in Chinese with English Abstract)
Wang, G. Q., Li, X. M., Xu, X. Y., Yu, J. Y., & Wu, P. (2014). Zircon U-Pb chronological study of the Hongshishan ophiolite in the Beishan area and their tectonic significance. Acta Petrologica Sinica, 30(6), 1685-1694. (in Chinese with English Abstract)
Wang, H., Zhang, H., Pan, Z. L., Wang, S., He, J. Y., Zhang, J. L., Hou, D. H., Ma, M. L., & Liu, Y. F. (2021). Geochemistry and geochronology of Hariama island arc granitoids in Beishan area of Inner Mongolia: geological implication. Geology and Resources, 30(2), 103-117. (in Chinese with English Abstract)
Wang, H. J., Guo, F., Zhao, H. B., Liu, J., & Wang, W. H. (2020). Determination of Silurian intrusive rocks in Mazongshan area, Beishan, Gansu and its tectonic significance. 29(3-4), 13-21. (in Chinese with English Abstract)
Wang, H. J., Guo, F., Zhao, H. B., Liu, J., & Wang, W. H. (2021). Determination of Silurian granites in Beishan, Gansu and its tectonic significance. Modern Mining, 37(3), 1-5. (in Chinese with English Abstract)
Wang, J. T., Dong, Y. P., Zeng, Z. C., Yang, Z., Sun, S. S., Zhang, F. F., Zhou, B., & Sun, J. P. (2016). Geochronology, geochemistry and geological significance of the Huangcaotan pluton in the southern Beishan Orogenic Belt. Geoscience, 30(5), 937-949. (in Chinese with English Abstract)
Wang, J. X., Zhang, K. X., Windley, B. F., Song, B. W., Kou, X. H., Wang, S. D., & Wang, L. J. (2020). A mid-Palaeozoic ocean–continent transition in the Mazongshan subduction–accretion complex, Beishan, NW China: new structural, chemical and age data constrain the petrogenesis and tectonic evolution. Geological Magazine, 157(11), 1877-1897. doi:10.1017/s0016756820000114
Wang, L., Yang, J. G., Wang, X. H., Qi, Q., & Xie, X. (2017). SHRIMP zircon U-Pb age of the Dashantounan granodiorite from Beishan Mountains in Gansu Province and its significance. Northwestern Geology, 50(4), 41-50. (in Chinese with English Abstract)
Wang, L. S., Yang, J. G., Xie, C. L., Lei, Y. X., Wang, Y. X., Cao, H. X., Yang, P. F., Qi, Y. L., Jin, S. L. (2009a). Geochronology and geochemistry of Haergentoukoubu granites in the Beishan area, Gansu, China and their geological significance. 83(3), 377-387. (in Chinese with English Abstract)
Wang, L. S., Yang, J. G., Wang, Y. X., Lei, Y. X., Xie, C. L., Cao, H. X., Yang, P. F., Qi, Y. L., & Gao, M. (2009b). Isotopic dating of basalt from Gongpoquan Group in Yingmaotuo area of the Beishan Mountain, Gansu Province, and its geological significance. Acta Geoscientica Sinica, 30(3), 363-368. (in Chinese with English Abstract)
Wang, S. D., Zhang, K. X., Song, B. W., Li, S. C., Li, M., & Zhou, J. (2018a). Geochronology and geochemistry of the Niujuanzi ophiolitic mélange, Gansu Province, NW China: implications for tectonic evolution of the Beishan Orogenic Collage. International Journal of Earth Sciences, 107(1), 269-289. doi:10.1007/s00531-017-1489-2
Wang, S. D., Zhang, K. X., Song, B. W., Li, S. C., Li, J. X., Yu, J. Y., & Bu, J. J. (2018b). Detrital Zircon U-Pb Geochronology from Greywackes in the Niujuanzi Ophiolitic Mélange, Beishan Area, NW China: Provenance and Tectonic Implications. Journal of Earth Science, 29(1), 103-113. doi:10.1007/s12583-018-0824-2
Wang, S. D., Zhang, K. X., Chen, F. N., Wang, J. X., Song, B. W., Li, J. X., Wang, W., & Dai, P. (2021). Recognition of a Permian to Triassic foreland basin in the central Beishan Orogen, NW China: Provenance variations and their constraints on latest Palaeozoic orogeny. Palaeogeography, Palaeoclimatology, Palaeoecology, 565, 110168. doi:10.1016/j.palaeo.2020.110168
Wang, X. Y., Yuan, C., Zhang, Y. Y., Long, X. P., Sun, M., Wang, L. X., Soldner, J., & Lin, Z. F. (2018a). S-type granite from the Gongpoquan arc in the Beishan Orogenic Collage, southern Altaids: Implications for the tectonic transition. Journal of Asian Earth Sciences, 153, 206-222. http://dx.doi.org/10.1016/j.jseaes.2017.07.037
Wang, X. Y., Yuan, C., Long, X. P., Zhang, Y. Y., & Lin, Z. F. (2018b). Geochronological, geochemical, and geological significance of Jianshan and Shibanjing granites in the Gongpoquan Arc, Beishan Orogenic Belt. Geochimica, 47(1), 63-78. (in Chinese with English Abstract)
Wang, Y., Luo, Z. H., Santosh, M., Wang, S. Z., & Wang, N. (2017). The Liuyuan Volcanic Belt in NW China revisited: evidence for Permian rifting associated with the assembly of continental blocks in the Central Asian Orogenic Belt. Geological Magazine, 154(02), 265-285. doi:10.1017/s0016756815001077
Wang, Y., Sun, G. H., & Li, J. Y. (2010). U-Pb (SHRIMP) and 40Ar/39Ar geochronological constraints on the evolution of the Xingxingxia shear zone, NW China: A Triassic segment of the Altyn Tagh fault system. Geological Society of America Bulletin, 122(3-4), 487-505. doi:10.1130/b26347.1
Wang, Y. H., Zhang, F. F., Li, B. C., Xue, C. J., Liu, J. J., Zhao, Y., & Zhang, W. (2020). Geology and genesis of the Cihai mafic intrusions in Beishan Terrane, Xinjiang, Northwest China: Implication for iron mineralization and tectonic setting. Ore Geology Reviews, 121, 103573. doi:10.1016/j.oregeorev.2020.103573
Wang, Y. X., Hou, L., Zhou, Q. H., Quan, S. C., Li, W. M., & Yang, S. F. (2014). The discussion of the granite genesis in Gansu Beishan Shibanjing Area. Xinjiang Geology, 32(3), 377-385. (in Chinese with English Abstract)
Wu, P., Wang, G. Q., Li, X. M., Yu, J. Y., & Kang, L. (2012). The age of Niujuanzi ophiolite in Beishan area of Gansu Province and its geological significance. Geological Bulletin of China, 31(12), 2032-2037. (in Chinese with English Abstract)
Xiao, P. X., You, W. F., Dong, Z. C., Xie, C. R., & Li, P. (2010). The re-definition of formation age of Xiaocaohu volcanic rocks in Beishan area, Gansu Province, China. Geological Bulletin of China, 29(9), 1268-1274. (in Chinese with English Abstract)
Xie, J. Q., Di, P. F., Yang, J., Chen, W. F., Wei, H. F., & Zhai, X. W. (2018). LA-ICP-MS zircon U-Pb age, geochemistry and tectonic implications of metamorphic dacite from Huaniushan Group in Beishan area, Gansu, China. Northwestern Geology, 51(1), 54-64. (in Chinese with English Abstract)
Xie, X., Li, W. M., Sun, J. M., Li, J., & Huang, M. (2018b). Geochemistry and zircon U-Pb dating of the Baishan mafic-ultramafic rock complex in the Beishan area of Xinjiang and its prospecting significance. Geological Science and Technology Information, 37(6), 11-21. (in Chinese with English Abstract)
Xie, X., Yang, J. G., Wang, X. H., Wang, L., Jiang, L., & Jiang, A. D. (2015). Zircon SHRIMP U-Pb dating of Hongliugou mafic-ultramafic complex in the Beishan area of Gansu Province and its geological significance. Geology in China, 42(2), 396-405. (in Chinese with English Abstract)
Xie, X., Zhao, G. B., Yang, H. Q., Yang, S. F., Ren, H. N., Jia, J., Sun, X. C., & Huang, Z. B. (2018a). LA-ICP-MS zircon U-Pb dating and geological significance of the Sunjialing scandium mineralized intrusion in the Beishan region, Gansu Province. Geology in China, 45(3), 483-492. (in Chinese with English Abstract)
Xiu, D., Chen, C., Zhuan, S. P., Shen, Z. Y., Wang, J. G., Chen, Z., Zhang, L. G., Wang, S., Yang, X. P., Hou, D. H., Shi, G. Y., & Zhang, P. C. (2018). Zircon U-Pb age and petrogenesis of tonalite-quartz diorite in the Shibanjing area, central Beishan orogenic belt, and its constraint on subduction of the ancient oceanic basin. Geological Bulletin of China, 37(6), 975-986. (in Chinese with Engli…
Xu, W., Xu, X. Y., Niu, Y. Z., Chen, G. C., Shi, J. Z., Wei, J. S., Song, B., & Zhang, Y. X. (2018). Geochronology, petrogenesis and tectonic implications of Early Permian A-type rhyolite from southern Beishan orogen, NW China. Acta Petrologica Sinica, 34(10), 3011-3033. (in Chinese with English Abstract)
Xu, W., Xu, X. Y., Niu, Y. Z., Song, B., Chen, G. C., Shi, J. Z., Zhang, Y. X., & Li, C. H. (2019a). Geochronology and petrogenesis of the Permian marine basalt in the southern Beishan region and their tectonic implications. Acta Geologica Sinica, 93(8), 1928-1953. (in Chinese with English Abstract)
Xu, W., Xu, X. Y., Lu, J. C., Niu, Y. Z., Chen, G. C., Shi, J. Z., Dang, B., Song, B., Zhang, Y. X., & Zhang, Q. (2019b). Geochronology, Petrogenesis and Tectonic Implications of Devonian High⁃K Acid Magmatic Rocks from Yemajing Area in Beishan Orogen. Earth Science, 44(8), 2775-2793. (in Chinese with English Abstract)
Xu, X. M., Cheng, H. F., Duan, B. X., & Xue, P. Y. (2018b). The LA-ICP-MS U-Pb geochronology of detrital zircons from quartzite in the Beishan Complex-Group in Biaoshan area in Beishan region during Changchengian Period and its geologic significance. Xinjiang Geology, 36(3), 393-398. (in Chinese with English Abstract)
Xu, X. M., Lu, Y., Xin, H. T., Zhang, Y., Zhang, Z. P., & Feng, Y. P. (2018a). The constraint of closing time of Paleo-Asian Ocean in the north edge of Beishan , Inner Mongolia: evidence from the Late Carboniferous quartz diorite in Heihongshan. J. Mineral. Petrol., 38(4), 66-75. (in Chinese with English Abstract)
Xue, S. C., Li, C., Qin, K. Z., & Tang, D. M. (2016). A non-plume model for the Permian protracted (266–286 Ma) basaltic magmatism in the Beishan–Tianshan region, Xinjiang, Western China. Lithos, 256-257, 243-249. doi:10.1016/j.lithos.2016.04.018
Xue, S. C., Qin, K. Z., Li, C. S., Tang, D. M., Wang, Q. F., & Wang, X. S. (2018). Permian bimodal magmatism in the southern margin of the Central Asian Orogenic Belt, Beishan, Xinjiang, NW China: Petrogenesis and implication for post-subduction crustal growth. Lithos, 314-315, 617-629. doi:10.1016/j.lithos.2018.06.021
Yan, H. Q., Zhao, H. Q., Ding, R. Y., Mi, S. H., Wang, Q., He, B. L., Fan, M. C., & Ren, J. M. (2012). Zircon SHRIMP U-Pb dating of the Dashantou basic complex and its geological significance in Beishan area, Gansu Province. Northwestern Geology, 45(4), 216-228. (in Chinese with English Abstract)
Yan, T., Xin, H. T., Wei, Y. S., Yang, W. B., & Li, Z. Y. (2020). A new thinking on the process of ocean-continent transition in Beishan orogenic belt of Inner Mongolia: Evidence from the Devonian arc granite in the south of Dahong Mountain. Geological Bulletin of China, 39(9), 1341-1366. (in Chinese with English Abstract)
Yang, F. L., Zhao, Z. X., Jia, W. Y., Yang, L., Xu, H., Jia, Y. Q., & Gao, Y. (2016). Discussion on the forming age of the Beishan Group in the Beishan area, Inner Mongolia. Geological Survey and Research, 39(2), 90-94. (in Chinese with English Abstract)
Yang, F. L., Zou, Y. X., Cao, X., Yang, L., Ma, G., & Gao, J. (2017). Zircon LA-ICPMS U-Pb dating for the quartz diorite in the south Pengboshan of Beishan area, Inner Mongolia. Geological Survey and Research, 40(2), 109-118. (in Chinese with English Abstract)
Yang, J. G., Wang, L., Wang, X. H., Xie, X., & Jiang, A. D. (2015). SHRIMP zircon U-Pb dating of the Xiaohongshan vanadium-titanium magnetite deposit, Ejin Banner, Beishan, Inner Mongolia, and its geological implications. Geological Bulletin of China, 34(9), 1699-1705. (in Chinese with English Abstract)
Yang, J. G., Wang, L., Xie, X., Wang, X. H., Qi, Q., Jiang, A. D., & Zhang, Z. Y. (2016). SHRIMP zircon U-Pb age and its signification of Guaishishan mafic-ultramafic complex in Beishan Mountains, Gansu Province. Geotectonica et Metallogenia, 40(1), 98-108. (in Chinese with English Abstract)
Yang, J. G., Zhai, J. Y., Yang, H. W., Wang, C. F., Xie, C. L., Wang, X. H. & Lei, Y. X. (2010). LA-ICP-MS zircon U-Pb dating of basalt and its geological significance in Huaniushan Pb-Zn deposit, Beishan area, Gansu, China. Geological Bulletin of China, 29(7), 1017-1023. (in Chinese with English Abstract)
Yang, Q. P., Ren, E. F., Zhao, H. B., Guan, S., Zhu, X. L., & Cheng, L. (2019). The LA-ICP-MS zircon U-Pb age of rhyolite in the Erdaoquan area of Beishan, Gansu, and its geological significance. Journal of Qinghai University, 37(1), 94-98. (in Chinese with English Abstract)
Yang, W. B., Yan, T., Zhang, Y., Wei, Y. S., & Li, Z. Y. (2020). Zircon U-Pb age and geochemistry of TTG rocks in Xiaohongshan area of the Beishan orogenic belt, Inner Mongolia, and their constraints on the properties of the Baihe Mountain tectonic belt. Geological Bulletin of China, 39(9), 1404-1421. (in Chinese with English Abstract)
Yang, Y. Q., Lv, B., Meng, G. X., Yan, J. Y., Zhao, J. H., Wang, S. G., Jia, L. L., & Han, J. G. (2013). Geochemistry, SHRIMP Zircon U-Pb Dating and Formation Environment of Dongqiyishan Granite, Inner Mongolia. Acta Geoscientica Sinica, 34(2), 163-175. (in Chinese with English Abstract)
Yang, Z. X., Ding, S. H., Zhang, J., Fan, X. X., Kong, W. Q., Zhao, J. C., & Jing, D. L. (2021). The discovery of Early Devonian adakites in Beishan orogenic belt and its geological significance. Acta Petrologica Mineralogica, 40(2), 185-201. (in Chinese with English Abstract)
Ye, X. F., Zong, K. Q., Zhang, Z. M., He, Z. Y., Liu, Y. S., Hu, Z. C., & Wang, W. (2013). Geochemistry of Neoproterozoic granite in Liuyuan area of southern Beishan orogenic belt and its geological significance. Geological Bulletin of China, 32(2/3), 307-317. (in Chinese with English Abstract)
Yi, P. F., Li, N., Gao, F., Feng, W. H., Tang, L., Gao, Y. P., Li, Q., Liu, W., & Song, D. Y. (2017). LA-ICP-MS zircon U-Pb ages of the granites from Mashan of Inner Mongolia and their geological significances. Geological Bulletin of China, 36(2-3), 331-341. (in Chinese with English Abstract)
Yu, F. S., Li, J. B., & Wang, T. (2006). The U-Pb isotopic age of zircon from Hongliuhe ophiolites in East Tianshan Monutains, Northwest China. Acta Geoscientica Sinica, 27(3), 213-216. (in Chinese with English Abstract)
Yu, J. P., Wang, H. T. Wang, Y. X., Sun, X. C., Ren, W. X., Wei, H. F., & Wang, X. W. (2021). Geochronology and geochemistry of Tanshanzidong olivine-gabbro in Beishan area, Gansu Province, and its geological significance. Acta Petrologica et Mineralogica, 40(2), 202-216. (in Chinese with English Abstract)
Yu, J. Y., Guo, L., Li, J. X., Li, Y. G., Smithies, R. H., Wingate, M. T. D., Meng, Y., & Chen, S. F. (2016). The petrogenesis of sodic granites in the Niujuanzi area and constraints on the Paleozoic tectonic evolution of the Beishan region, NW China. Lithos, 256-257, 250-268. doi:10.1016/j.lithos.2016.04.003
Yu, J. Y., Ji, B., Guo, L., Guo, L., & Bu, T. (2018). Geological characteristics and age determination of the Palaeoproterozoic Gudongjing Group complex in the Beishan Mountain, Gansu Province. Geological Bulletin of China, 37(4), 704-715. (in Chinese with English Abstract)
Yu, J. Y., Li, X. M., Wang, G. Q., Wu, P., & Yan, Q. J. (2012). Zircon U-Pb ages of Huitongshan and Zhangfangshan ophiolite in Beishan of Gansu-Inner Mongolia border area and their significance. Geological Bulletin of China, 31(12), 2038-2045. (in Chinese with English Abstract)
Yu, L. D., Zhang, J., Wang, Q. S., Wang, C. Y., & Lai, C. (2020). Geochronology and geochemistry of granodiorite at Jinwozi Au deposit: Tectonomagmatic evolution for Palaeozoic Beishan Orogen (Central Asian Orogenic Belt) in NW China. Geological Journal, 55(10), 6779-6798. doi:10.1002/gj.3836
Yuan, Y., Zong, K. Q., He, Z. Y., Klemd, R., Liu, Y. S., Hu, Z. C., Guo, J. L., & Zhang, Z. M. (2015). Geochemical and geochronological evidence for a former early Neoproterozoic microcontinent in the South Beishan Orogenic Belt, southernmost Central Asian Orogenic Belt. Precambrian Research, 266, 409-424. http://dx.doi.org/10.1016/j.precamres.2015.05.034
Yuan, Y., Zong, K. Q., He, Z. Y., Klemd, R., Jiang, H. Y., Zhang, W., Liu, Y. S., Hu, Z. C., & Zhang, Z. M. (2018). Geochemical evidence for Paleozoic crustal growth and tectonic conversion in the Northern Beishan Orogenic Belt, southern Central Asian Orogenic Belt. Lithos, 302-303, 189-202. https://doi.org/10.1016/j.lithos.2017.12.026
Yuan, Y., Zong, K. Q., Cawood, P. A., Cheng, H., Yu, Y. Y., Guo, J. L., Liu, Y. S., Hu, Z. C., Zhang, W & Li, M. (2019). Implication of Mesoproterozoic (∼1.4 Ga) magmatism within microcontinents along the southern Central Asian Orogenic Belt. Precambrian Research, 327, 314-326. http://doi.org/10.1016/j.precamres.2019.03.014
Zhang, D. Y., Fu, X., Wei, O. X., Ye, L. X., Jiang, H., Zhang, Y., & Xin, H. T. (2020). Discovery of the Silurian andesitic porphyry in the Xiaohulishan Mo-polymetallic deposit, the Beishan district, Inner Mongolia, and its geological significance. Earth Science Frontiers, 27(3), 222-238. (in Chinese with English Abstract)
Zhang, H., Wang, H., Pan, Z. L., Wang, S., Chen, C., Zhang, J. L., Zhang, L. G., & Li, Q. Z. (2021). Geochronological constraints and deformation of the western section of Shibanjing ductile shear zone in Beishan, Inner Mongolia. Geological Bulletin of China, 40(6), 930-941. (in Chinese with English Abstract)
Zhang, J. J. (2014). The petrogenesis and mineralization potential of two types of mafic-ultramafic intrusions, Gansu Beishan, China. PhD Thesis, Chang’an University, Xi’an, China. (in Chinese with English Abstract)
Zhang, J. R. (2017). SHRIMP zircon U-Pb chronology and geological significance of Carboniferous Qingshuiquan complex in Beishan region across Gansu and Inner Mongolia. Gansu Geology, 26(1), 32-39. (in Chinese with English Abstract)
Zhang, W. (2013). Late Paleozoic granitoids in Beishan–Northern Alxa area (NW China) and their tectonic implications. PhD thesis, Peking University. (in Chinese with English Abstract)
Zhang, W., Feng, J. C., Zheng, R. G., Wu, T. R., Luo, H. L., He, Y. K., & Jing, X. (2011). LA-ICP MS zircon U-Pb ages of the granites from the south of Yin'aoxia and their tectonic significances. Acta Petrologica Sinica, 27(6), 1649-1661. (in Chinese with English Abstract)
Zhang, W., Pease, V., Wu, T. R., Zheng, R. G., Feng, J. C., He, Y. K., Luo, H. L., & Xu, C. (2012a). Discovery of an adakite-like pluton near Dongqiyishan (Beishan, NW China) — Its age and tectonic significance. Lithos, 142-143, 148-160. http://doi.org/10.1016/j.lithos.2012.02.021
Zhang, W., Pease, V., Meng, Q., Zheng, R., Thomsen, T. B., Wohlgemuth-Ueberwasser, C., & Wu, T. (2015). Timing, petrogenesis, and setting of granites from the southern Beishan late Palaeozoic granitic belt, Northwest China and implications for their tectonic evolution. International Geology Review, 57(16), 1975-1991. doi:10.1080/00206814.2015.1045944
Zhang, W., Pease, V., Meng, Q. P., Zheng, R. G., & Wu, T. R. (2017). Age and petrogenesis of Mingshui-Shuangjingzi granites from the northern Beishan area, northwest China, and their implications for tectonic evolution. Geosciences Journal, 21(5), 667-682. doi:10.1007/s12303-017-0017-5
Zhang, W., Pease, V., Meng, Q. P., Zheng, R. G., & Wu, T. R. (2018). Recognition of a Devonian‐early Mississippian plutonic belt in the eastern Beishan area, Northwest China, and its tectonic implications. Geological Journal, 53, 803-819. http://doi.org/10.1002/gj.2928
Zhang, W., Wu, T. R., He, Y. K., Feng, J. C., & Zheng, R. G. (2010). LA-ICP-MS zircon U-Pb ages of Xijianquanzi alkali-rich potassium-high granites in Beishan, Gansu Province, and their tectonic significance. Acta Petrologica et Mineralogica, 29(6), 719-731. (in Chinese with English Abstract)
Zhang, W., Wu, T. R., Zheng, R. G., Feng, J. C., Luo, H. L., He, Y. K., & Xu, C. (2012b). Post-collisional Southeastern Beishan granites: Geochemistry, geochronology, Sr-Nd-Hf isotopes and their implications for tectonic evolution. Journal of Asian Earth Sciences, 58, 51-63. http://dx.doi.org/10.1016/j.jseaes.2012.07.004
Zhang, X. Q., Wei, Q. R., Wei, J. H., Sun, J., Hao, W., & Zhang, D. C. (2012). Geochemical characteristics and significance of Late Devonian gabbros in Jidong area, Inner Mongolia. Geological Science and Technology Information, 31(6), 80-87. (in Chinese with English Abstract)
Zhang, Y. L., Xu, R. K., Shan, L., Jian, Q. Z., Song, Z. B., Chen, X. Y., Zhang, X. F., Chen, B., Li, Y. Z., & Quan, S. C. (2012). Rock-forming and ore-forming ages of the Xiaohulishan molybdenum deposit in Beishan area, Inner Mongolia. Geological Bulletin of China, 31(2-3), 469-475. (in Chinese with English Abstract)
Zhang, Y. Y., & Guo, Z. J. (2008). Accurate constraint on formation and emplacement age of Hongliuhe ophiolite, boundary region between Xinjiang and Gansu Provinces and its tectonic implications. Acta Petrologica Sinica, 24(4), 803-809. (in Chinese with English Abstract)
Zhang, Y. Y., Dostal, J., Zhao, Z. H., Liu, C., & Guo, Z. J. (2011). Geochronology, geochemistry and petrogenesis of mafic and ultramafic rocks from Southern Beishan area, NW China: Implications for crust-mantle interaction. Gondwana Research, 20, 816-830. http://doi.org/10.1016/j.gr.2011.03.008
Zhang, Y. Y., Yuan, C., Sun, M., Long, X. P., Xia, X. P., Wang, X. Y., & Huang, Z. Y. (2015). Permian doleritic dikes in the Beishan Orogenic Belt, NW China: Asthenosphere–lithosphere interaction in response to slab break-off. Lithos, 233, 174-192. doi:10.1016/j.lithos.2015.04.001
Zhang, Z. P., Duan, B. X., Meng, Q. T., Xu, C., Dong, H. K., Liu, G., & Ti, Z. H. (2017). LA-ICP-MS zircon U-Pb dating of amphibolites of the Beishan group in the Beishan area, Inner Mongolia and its geological significance. Geology and Exploration, 53(6), 1129-1139. (in Chinese with English Abstract)
Zhang, Z. P., Xin, H. T., Cheng, H. F., Zhang, Y., Liang, G. Q., Ti, Z. H., Zhu, W., Su, P. T., Du, J. L., Wang, M., & Zhao, Q. Y. (2020). The discovery of the Elegen ophiolite in Beishan orogenic belt, Inner Mongolia: Evidence for the east extension of the Hongshishan-Baiheshan ophiolite belt. Geological Bulletin of China, 39(9), 1389-1403. (in Chinese with English Abstract)
Zhao, H. G., Liang, J. W., Wang, J., Su, R., Jin, Y. X., Tian, X., & Luo, H. (2019). Geochronology and geochemical characteristics of the Suanjingzi adakitic granites in the Beishan Mountains, Gansu Province, China, and their tectonic significance. Acta Geologica Sinica, 93(2), 329-352. (in Chinese with English Abstract)
Zhao, K. Q., Ma, S. M., Xi, M. J., Yang, J. Z., Cai, Y. W., & Gong, J. J. (2020). The LA-ICP-MS Zircon U-Pb ages and geochemical characteristics of Late Paleozoic intermediate-acidic intrusive complexes in Shibanjing area, Beishan Mountains, Inner Mongolia, and their geological significance. Geological Review, 66(1), 69-87. (in Chinese with English Abstract)
Zhao, P. B., Li, W. C., Luo, Q. Z., Peng, H. L., Li, Y., Li, W. J., & Zhang, S. H. (2019). Formation age and tectonic environment of Yingzuihongshan granite in Beishan, Inner Mongolia. Northwestern Geology, 52(4), 1-13. (in Chinese with English Abstract)
Zhao, P. B., Zhang, J. J., Gao, Y. P., Zhu, H. P., Li, W. J., & He, Z. F. (2017). Geochronology and geochemistry of northern Baiyunshan granites in the Beishan area, Inner Mongolia, China and their geological significance. Northwestern Geology, 50(3), 36-46. (in Chinese with English Abstract)
Zhao, Y., Sun, Y., Diwu, C. R., Zhu, T., Ao, W. H., Zhang, H., & Yan, J. H. (2017). Paleozoic intrusive rocks from the Dunhuang tectonic belt, NW China: Constraints on the tectonic evolution of the southernmost Central Asian Orogenic Belt. Journal of Asian Earth Sciences, 138, 562-587. doi:10.1016/j.jseaes.2017.02.037
Zhao, Z. H., Guo, Z. J., & Wang, Y. (2007). Geochronology, geochemical characteristics and tectonic implications of the granitoids from Liuyuan area, Beishan, Gansu province, northwest China. Acta Petrologica Sinica, 23(8), 1847-1860. (in Chinese with English Abstract)
Zhao, Z. N., Yang, J. K., Wei, M., Wang, Z. L., & Guo, S. E. (2020). Geological significance and characteristics of geochemistry and geochronology of Baiyunshan granodiorite in the Beishan area of Inner Mongolia. Mineralogy and Petrology, 40(3), 53-66. (in Chinese with English Abstract)
Zhao, Z. X., Jia, Y. Q., Xu, H., Wang, J. R., Wang, X. L., & Liu, Q. (2015). LA-ICP-MS zircon U-Pb age of quartz diorite from the Jiaochagou area in Beishan orogenic belt, Inner Mongolia, and its tectonic significance. Acta Geologica Sinca, 89(7), 1210-1218. (in Chinese with English Abstract)
Zhao, Z. X., Xiong, Y., Jia, Y. Q., Wang, J. R., Xu, H., Gao, J., Wang, X. L., & Liu, Q. (2018). The continental arcs magmatic at the Dulongbao Area in Beishan orogenic belt in Late Carboniferous: evidences from zircon U-Pb dating and geochemistry of the granodiorite. Geological Review, 64(3), 597-609. (in Chinese with English Abstract)
Zhao, Z. X., Xu, H., Jia, Y. Q., Gao, Y., Chen, H. D., & Gao, J. (2016). Geochemistry and LA-ICP-MS zircon U-Pb age of porphyritic granodiorite in the Beishan orogenic belt in Inner Mongolia and their geological significance. East China Geology, 37(4), 252-258. (in Chinese with English Abstract)
Zheng, R. G., Li, J. Y., Xiao, W. J., & Zhang, J. (2017). Nature and provenance of the Beishan Complex, southernmost Central Asian Orogenic Belt. International Journal of Earth Sciences, 107(2), 729-755. doi:10.1007/s00531-017-1525-2
Zheng, R. G., Li, J. Y. & Xiao, W. J. (2019). Mid-Paleozoic ridge subduction in the Central Beishan of the southern Altaids: evidence from geochemical, Sr-Nd and zircon U-Pb-Hf-O isotopic data of Gongpoquan volcanic rocks. Journal of the Geological Society, 176, 755-770. https://doi.org/10.1144/jgs2018-231
Zheng, R. G., Li, J. Y., Zhang, J., Xiao, W. J., & Wang, Q. J. (2020). Permian oceanic slab subduction in the southmost of Central Asian Orogenic Belt: Evidence from adakite and high-Mg diorite in the southern Beishan. Lithos, 358-359, 105406. http://doi.org/10.1016/j.lithos.2020.105406
Zheng, R. G., Li, J. Y., Zhang, J., & Xiao, W. J. (2021). A prolonged subduction-accretion in the southern Central Asian Orogenic Belt: Insights from anatomy and tectonic affinity for the Beishan complex. Gondwana Research, 95, 88-112. doi:10.1016/j.gr.2021.02.022
Zheng, R. G., Wang, Y. P., Zhang, Z. Y., Zhang, W., Meng, Q. P., & Wu, T. R. (2016a). Geochronology and Geochemistry of Yinwaxia Acidic Volcanic Rocks in the Southern Beishan: New Evidence for Permian Continental Rifting. Geotectonica et Metallogenia, 40(5), 1031-1048. (in Chinese with English Abstract)
Zheng, R. G., Wu, T. R., Zhang, W., Xu, C., & Meng, Q. P. (2012). Early Devonian Tectono-Magmatic Events in the Middle Beishan, Gansu Province: Evidence from Chronology and Geochemistry of Gongpoquan Granite. Acta Scientiarum Naturalium Universitatis Pekinensis, 48(4), 603-616. (in Chinese with English Abstract)
Zheng, R. G., Wu, T. R., Zhang, W., Xu, C., & Meng, Q. P. (2013). Late Paleozoic subduction system in the southern Central Asian Orogenic Belt: Evidences from geochronology and geochemistry of the Xiaohuangshan ophiolite in the Beishan orogenic belt. Journal of Asian Earth Sciences, 62, 463-475. http://dx.doi.org/10.1016/j.jseaes.2012.10.033
Zheng, R. G., Wu, T. R., Zhang, W., Meng, Q. P., & Zhang, Z. Y. (2014). Geochronology and geochemistry of late Paleozoic magmatic rocks in the Yinwaxia area, Beishan: Implications for rift magmatism in the southern Central Asian Orogenic Belt. Journal of Asian Earth Sciences, 91, 39-55. http://dx.doi.org/10.1016/j.jseaes.2014.04.022
Zheng, R. G., Wu, T. R., Xiao, W. J., Meng, Q. P., & Zhang, W. (2016b). Geochronology, geochemistry and tectonic implications of the Shuangjizi composite pluton in the northern Beishan. Acta Geologica Sinica, 90(11), 3153-3172. (in Chinese with English Abstract)
Zheng, R. G., Xiao, W. J., Li, J. Y., Wu, T. R., & Zhang, W. (2018). A Silurian-early Devonian slab window in the southern Central Asian Orogenic Belt: Evidence from high-Mg diorites, adakites and granitoids in the western Central Beishan region, NW China. Journal of Asian Earth Sciences, 153, 75-99. http://dx.doi.org/10.1016/j.jseaes.2016.12.008
Zheng, Y., Chen, J., Pang, J. C., & Wang, J. L. (2009). Basic rock SHRIMP dating & its geologic value in Heishanling region of Beishan area, Xinjiang. Xinjiang Geology, 27(4), 320-324. (in Chinese with English Abstract)
Zhou, H., Chen, L., & Sun, Y. (2018). Zircon U-Pb chronology and Hf isotope study on the Mesoproterozoic metasedimentary rocks: insight into the evolution of Precambrian materials in the south section of Beishan Orogen. Acta Geologica Sinica, 92(5), 928-945. (in Chinese with English Abstract)
Zhuan, S. P., Chen, C., Shen, Z. Y., Pan, Z. L., Zhang, Y. Q., Zhao, H. P., Chen, H. Q., Yang, R., & Xiu, D. (2018). Early Paleozoic subduction of the ocean in Beishan region: Zircon U-Pb geochronological and geochemical evidence from the high-Mg diorite in the Shibanjing area. Acta Petrologica et Mineralogica, 37(4), 533-546. (in Chinese with English Abstract)
Zhu, J., Lv, X. B., Peng, S. G., Gong, Y. J., Qiu, X. F., & Xiao, G. L. (2015). LA-ICP-MS zircon U-Pb geochronology and geochemical characteristics of the quartz syenite porphyry in the Xiaoxigong gold deposit and their geological implications. Geological Bulletin of China, 34(8), 1460-1469. (in Chinese with English Abstract)
Zhu, J., Lv, X. B., & Peng, S. G. (2016). U-Pb zircon geochronology, geochemistry and tectonic implications of the early Devonian granitoids in the Liuyuan area, Beishan, NW China. Geosciences Journal, 20(5), 609-625. doi:10.1007/s12303-016-0004-2
Zhu, W., Zhang, Z. P., Sun, Y. S., Cheng, H. F., Ti, Z. H., Du, J. L., Su, P. T., Feng, Y. P., & Liang, G. Q. (2019). Time constraint on the closing of the Paleo-Asian Ocean in northern Beishan of Inner Mongolia: Evidence from Heihongshan admellite. Geological Bulletin of China, 38(11), 1846-1857. (in Chinese with English Abstract)
Zong, K. Q., Klemd, R., Yuan, Y., He, Z. Y., Guo, J. L., Shi, X. L., Liu, Y. S., Hu, Z. C., & Zhang, Z. M. (2017). The assembly of Rodinia: The correlation of early Neoproterozoic (ca. 900 Ma) high-grade metamorphism and continental arc formation in the southern Beishan Orogen, southern Central Asian Orogenic Belt (CAOB). Precambrian Research, 290, 32-48. http://doi.org/10.1016/j.precamres.2016.1…
Zong, K. Q., Liu, Y. S., Zhang, Z. M., He, Z. Y., Hu, Z. C., Guo, J. L., & Chen, K. (2013). The generation and evolution of Archean continental crust in the Dunhuang block, northeastern Tarim craton, northwestern China. Precambrian Research, 235, 251-263. doi:10.1016/j.precamres.2013.07.002
